# Supplementary material for: Identification of a major QTL and associated molecular marker for high arabinoxylan fibre in white wheat flour
Source: PubMed Central journal article supplement (PMC7001892; doi:10.1371/journal.pone.0227826), 2020-02-05

QTLs: Y34Alt – ReVis – 2D1

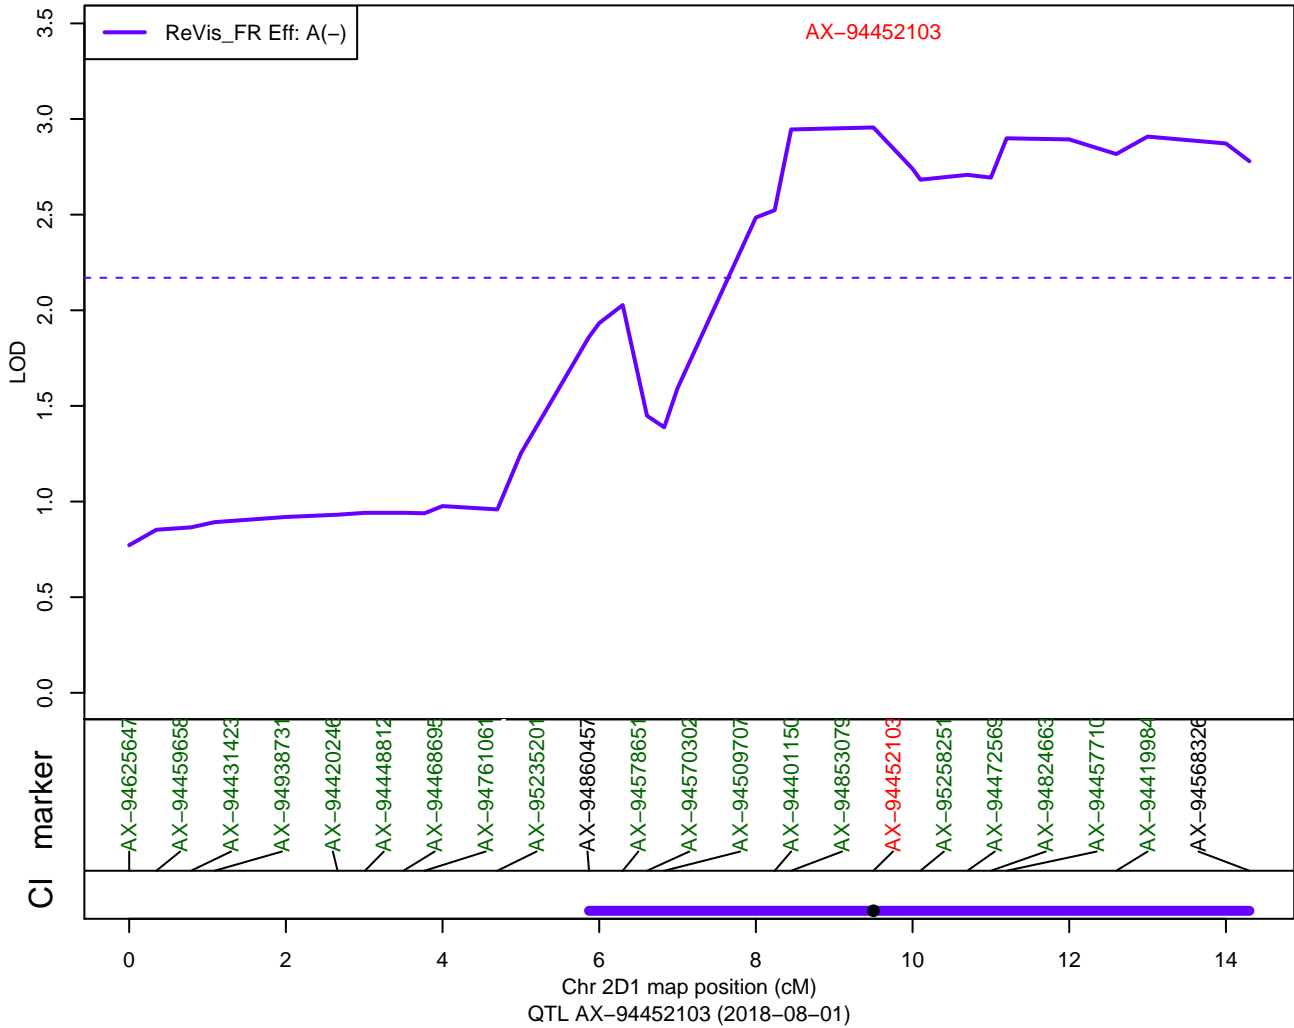

QTLs: Y34Alt – ReVis – 3B1

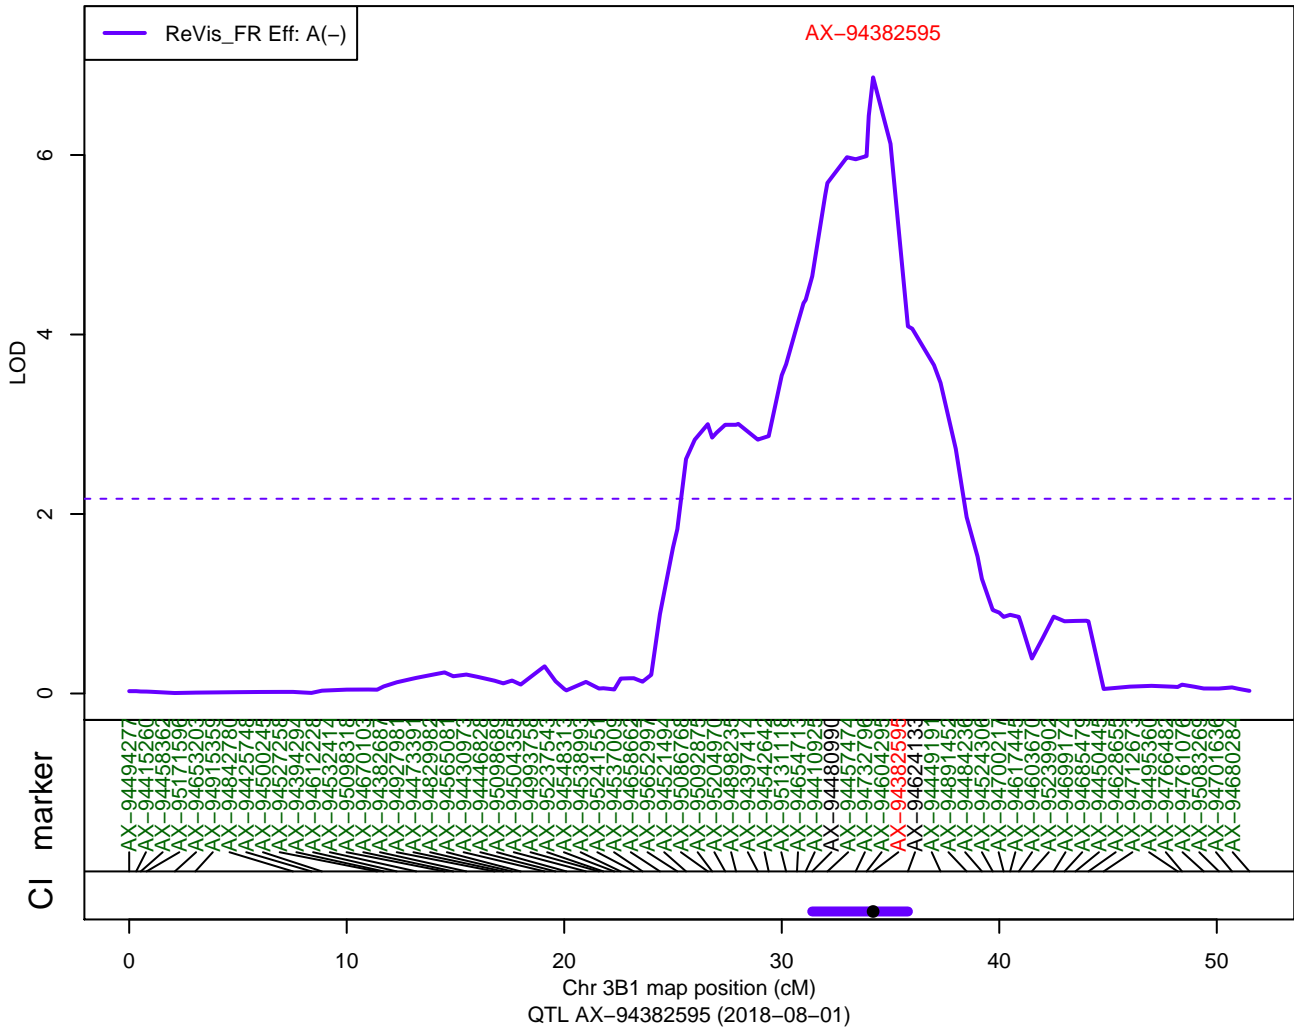

QTLs: Y34Alt - ReVis - 4B1

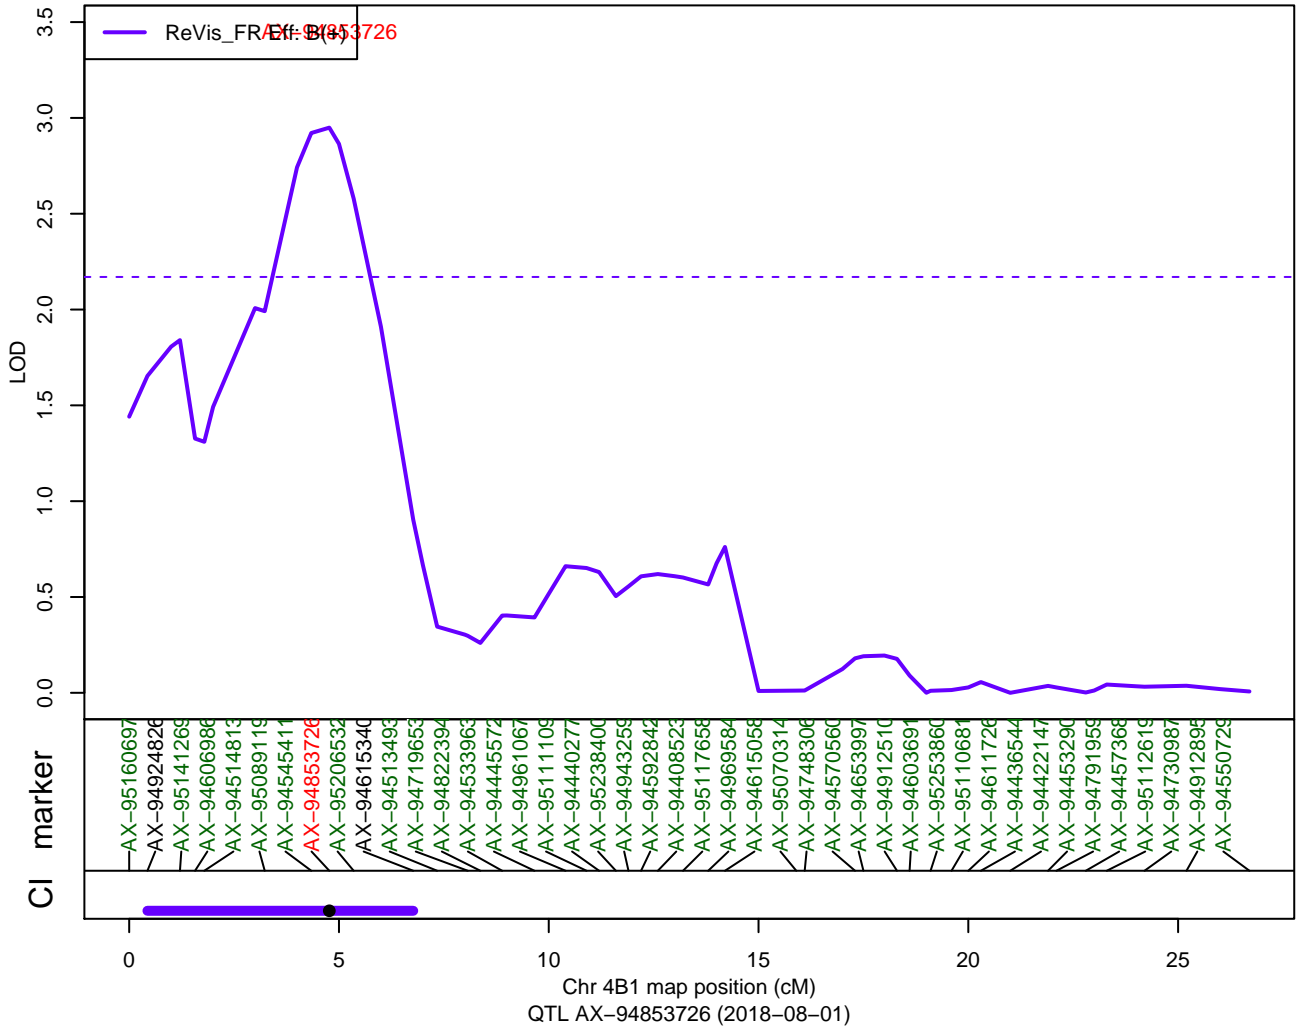

QTLs: Y34Alt - ReVis - 4D1

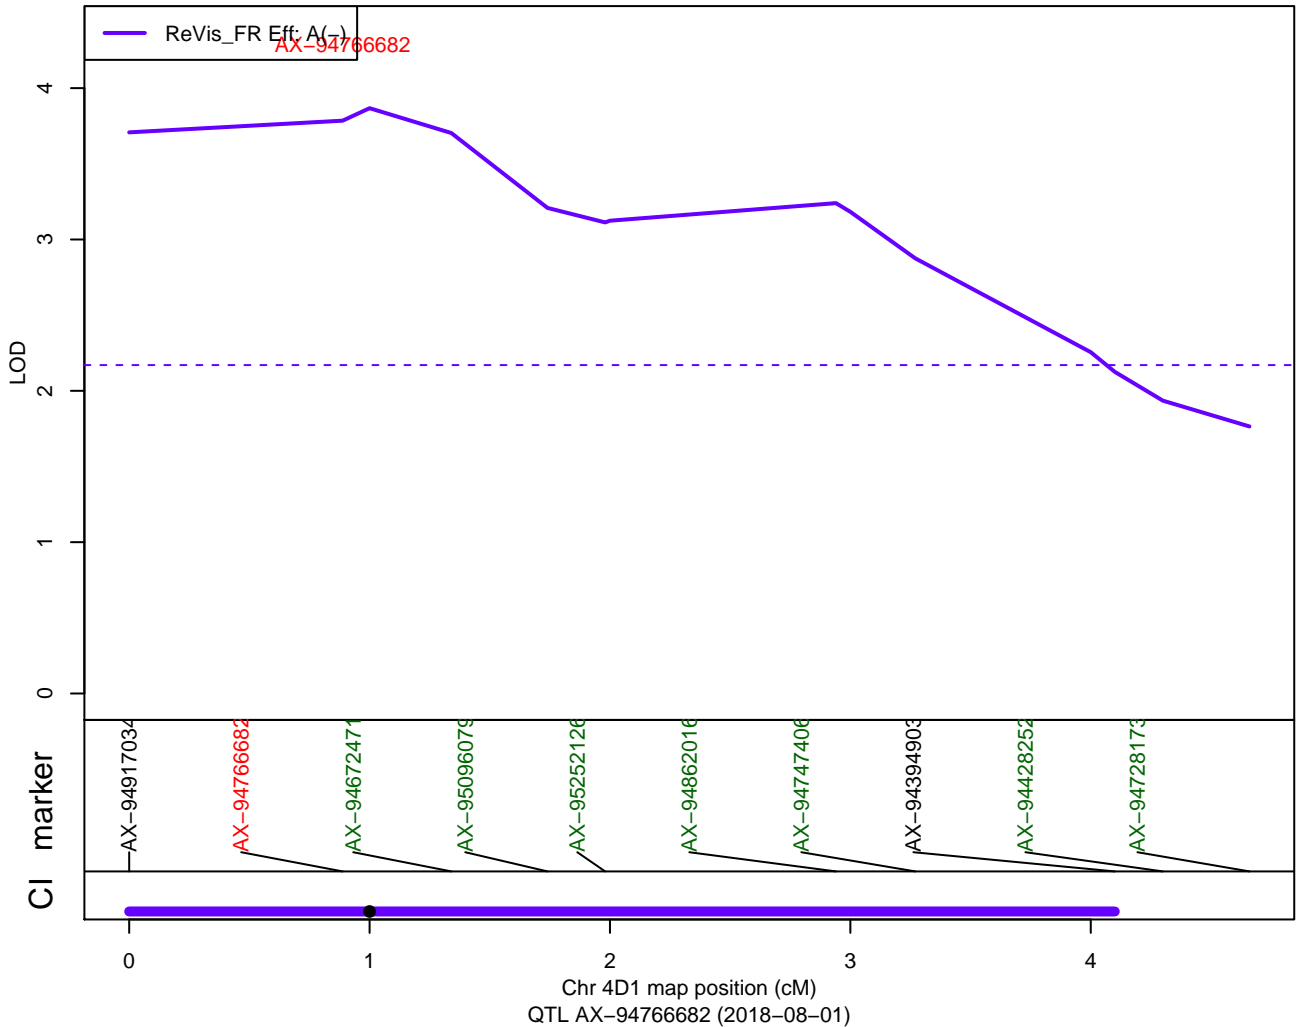

QTLs: Y34C1a – TOTAX – 1B

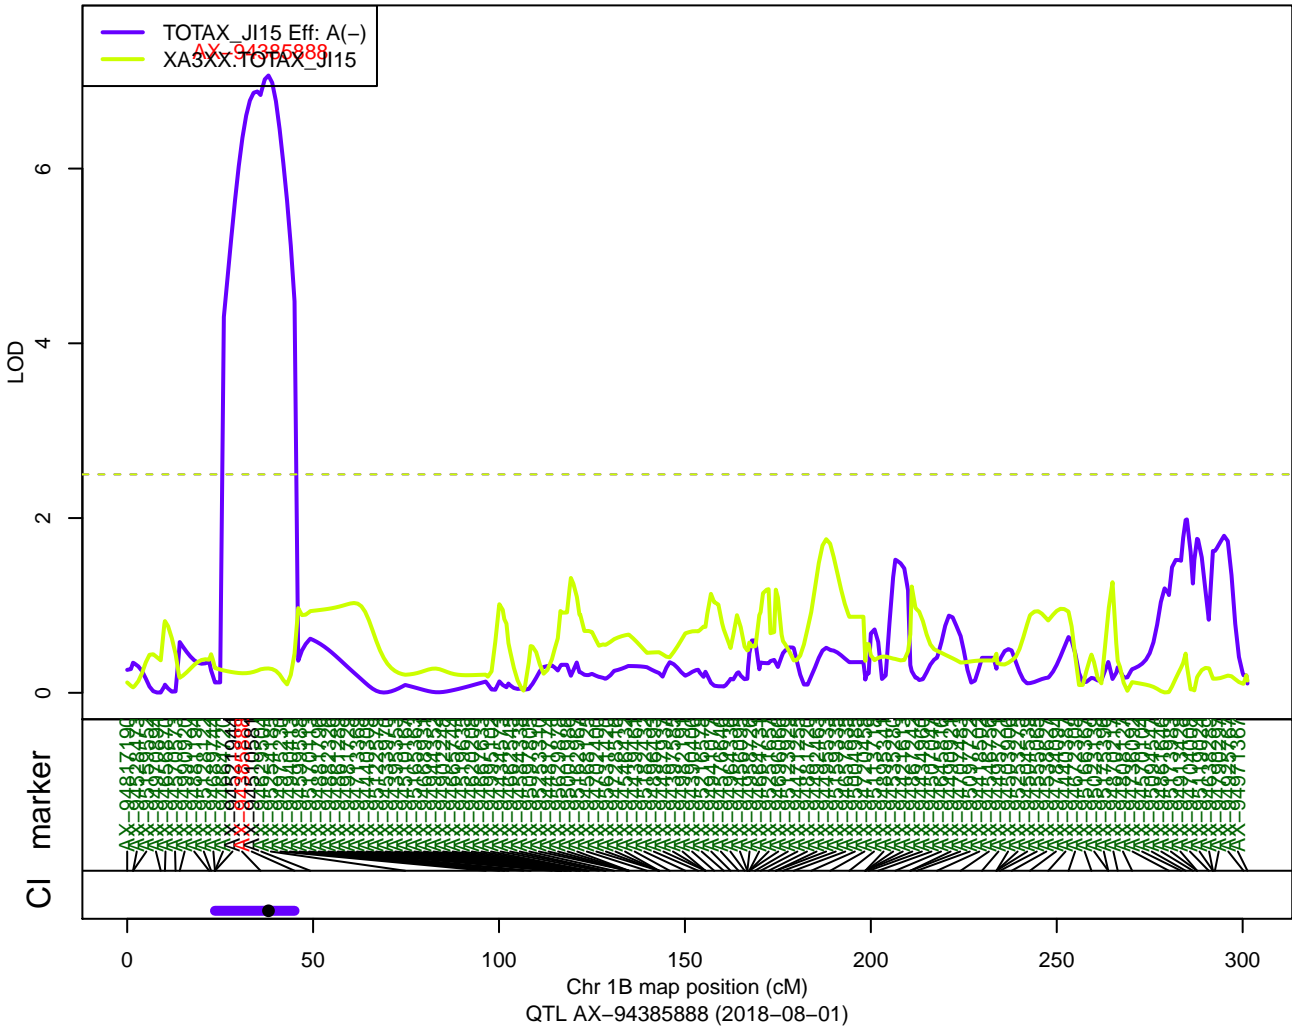

QTLs: Y34C1a – TOTAX – 5D2

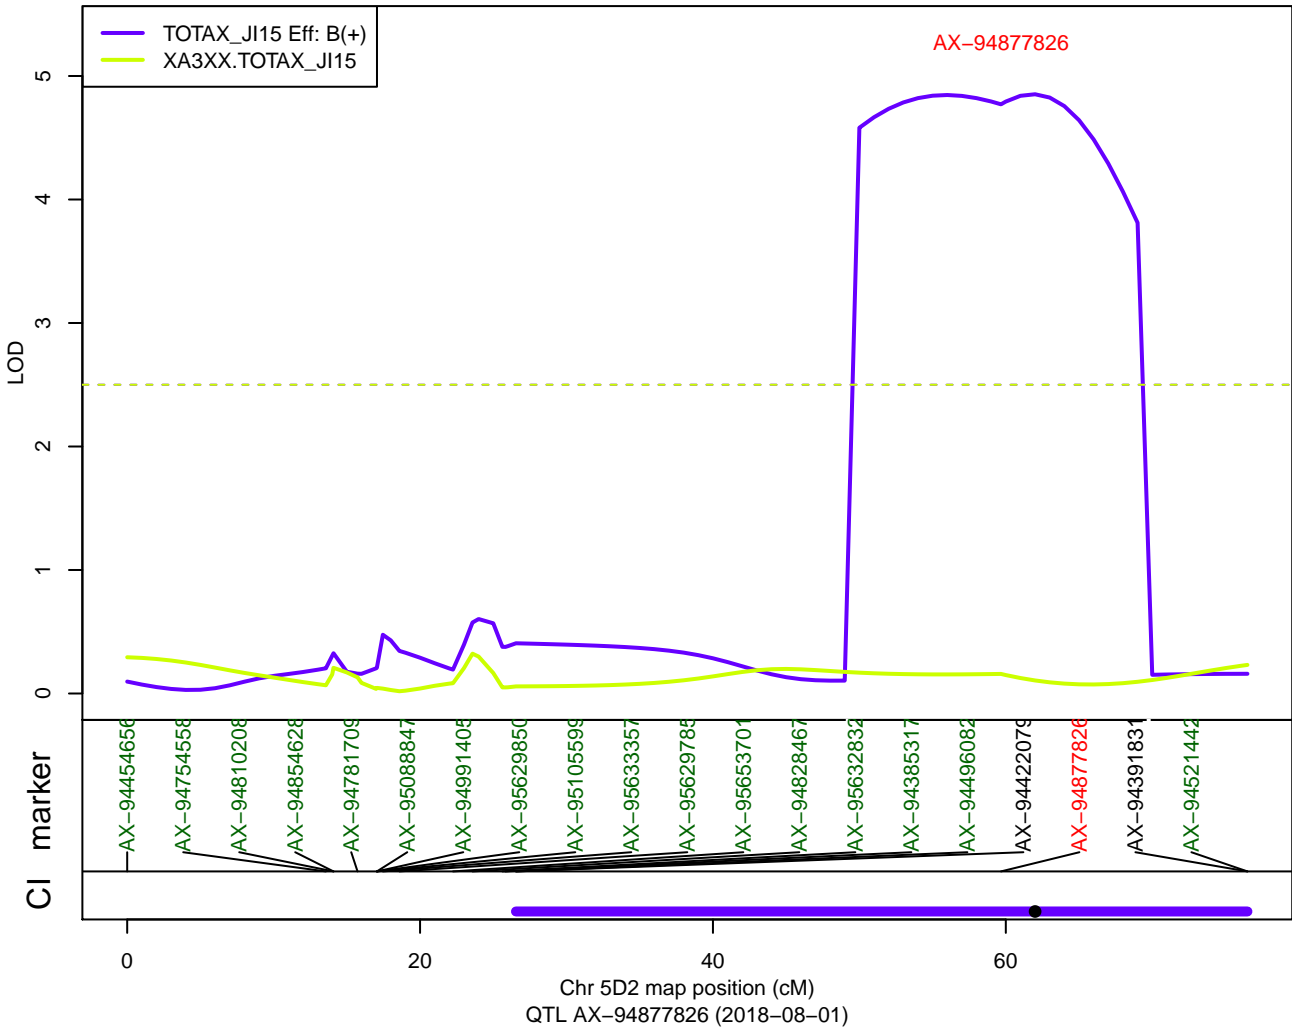

### QTLs: Y34Cla – ReVIS – 3A1

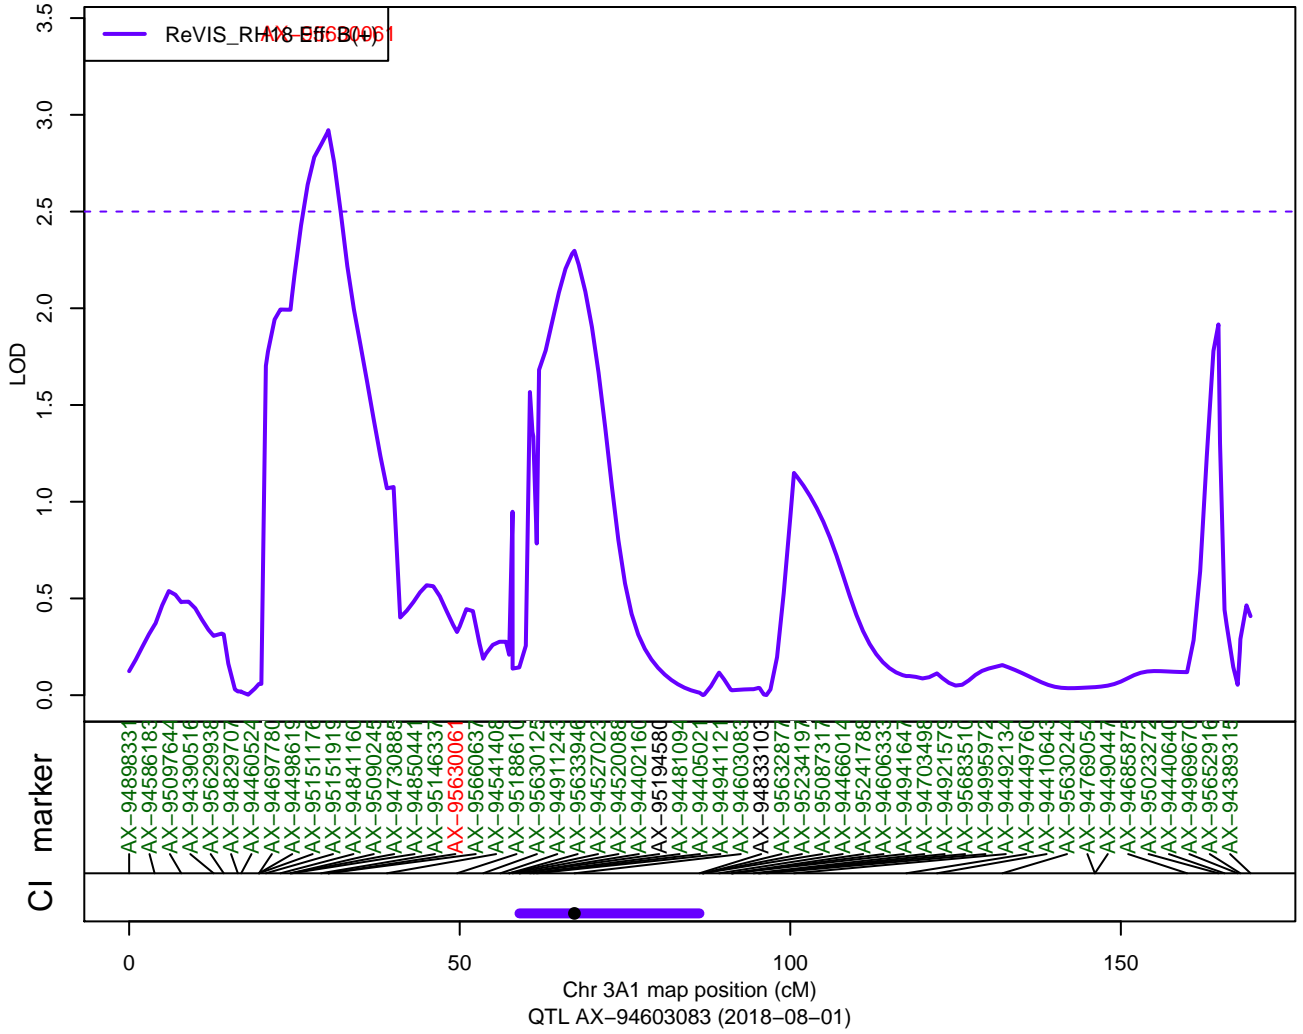

QTLs: Y34C1a - ReVIS - 3B

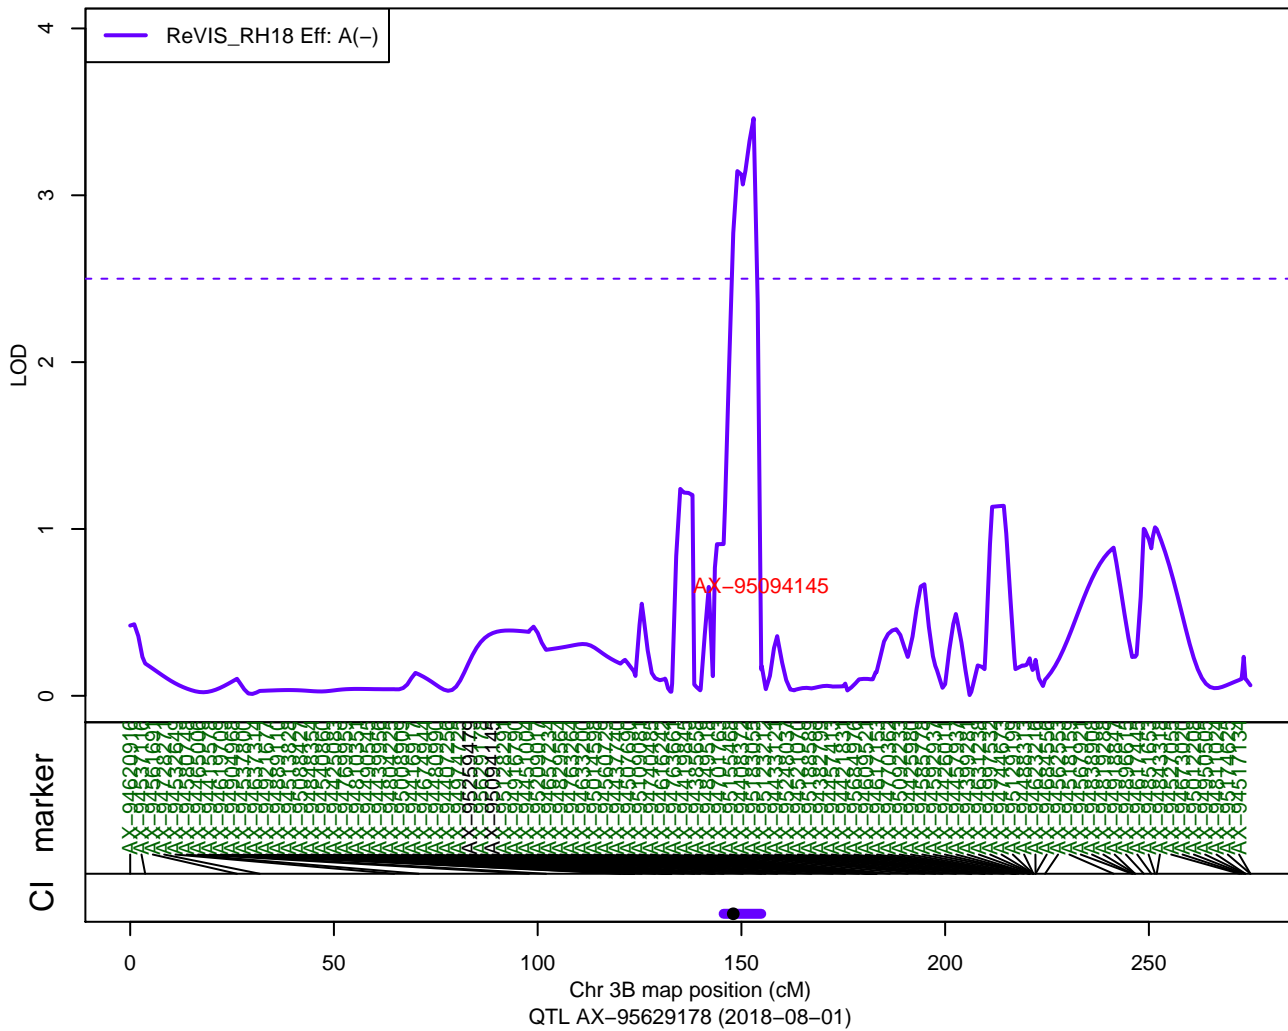

### QTLs: Y34Cla - TOTAX - 2D

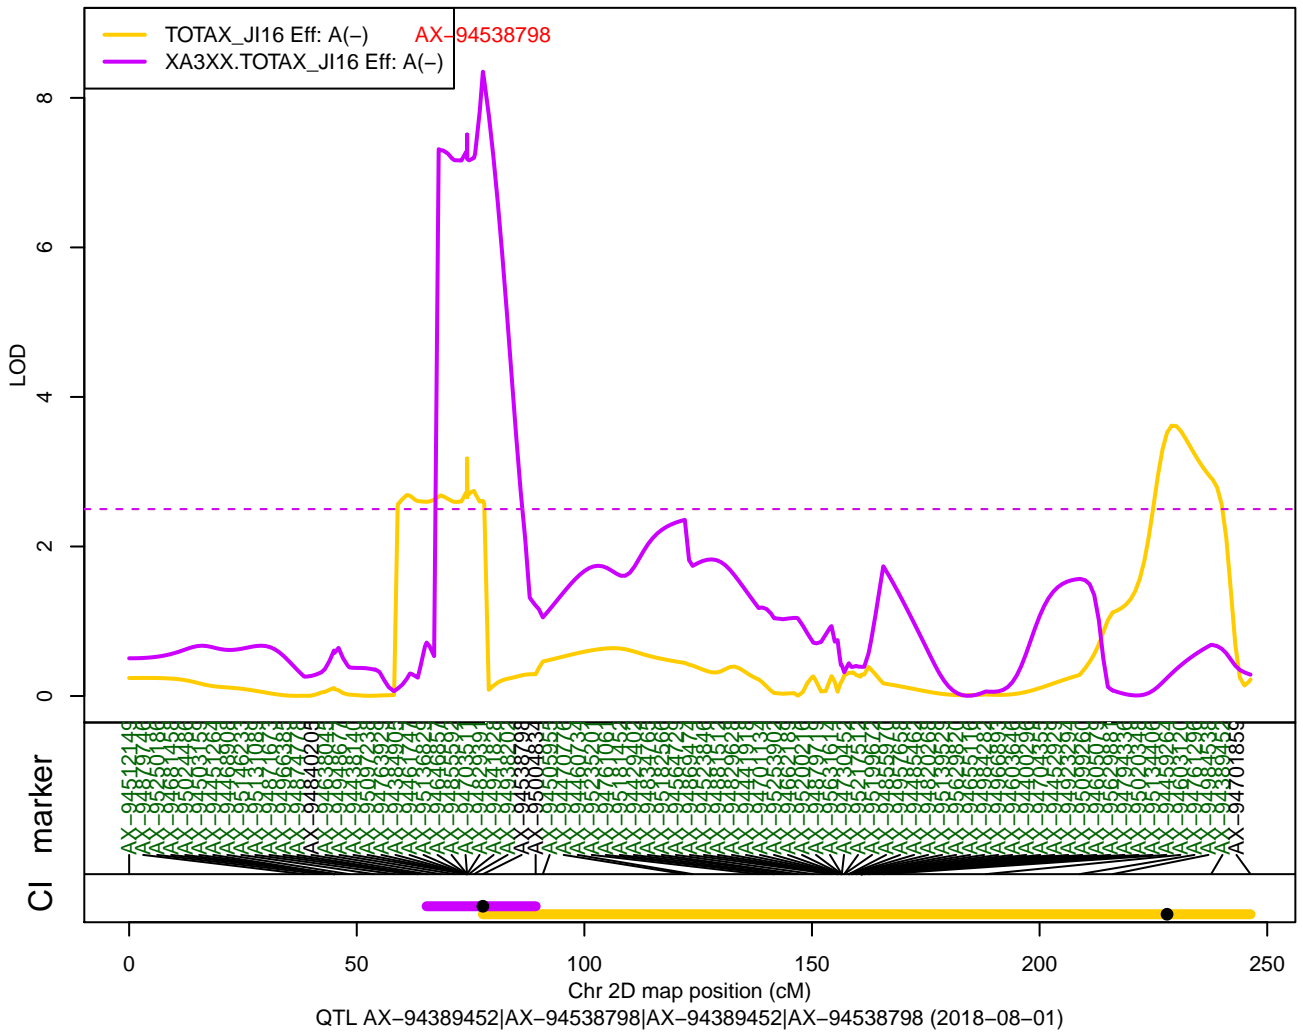

QTLs: Y34Ukr – ReVIS – 3B

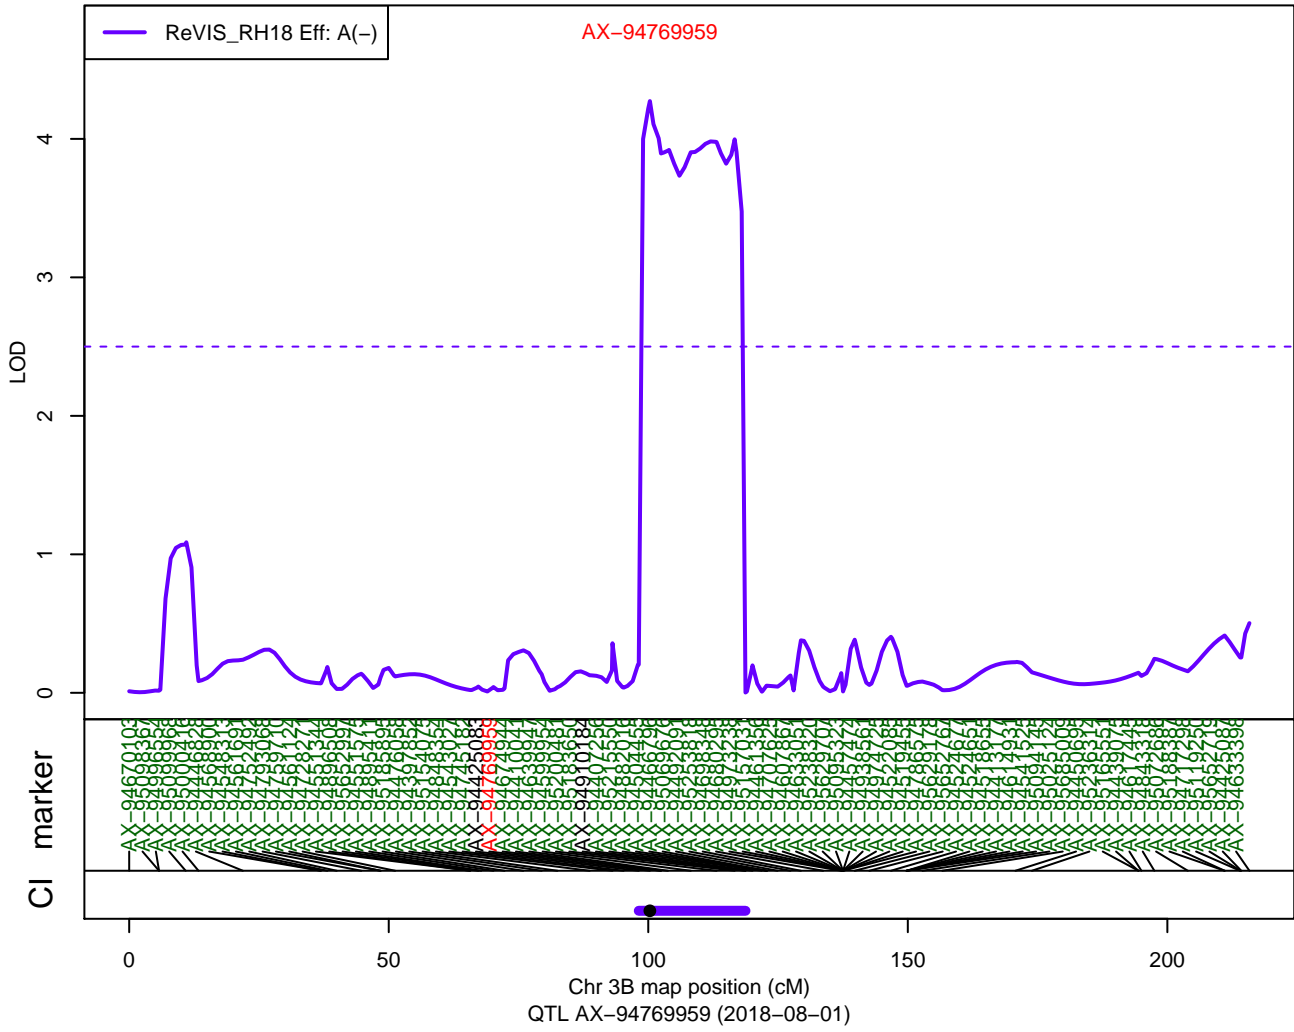





### QTLs: Y34Ukr - TOTAX - 2A2

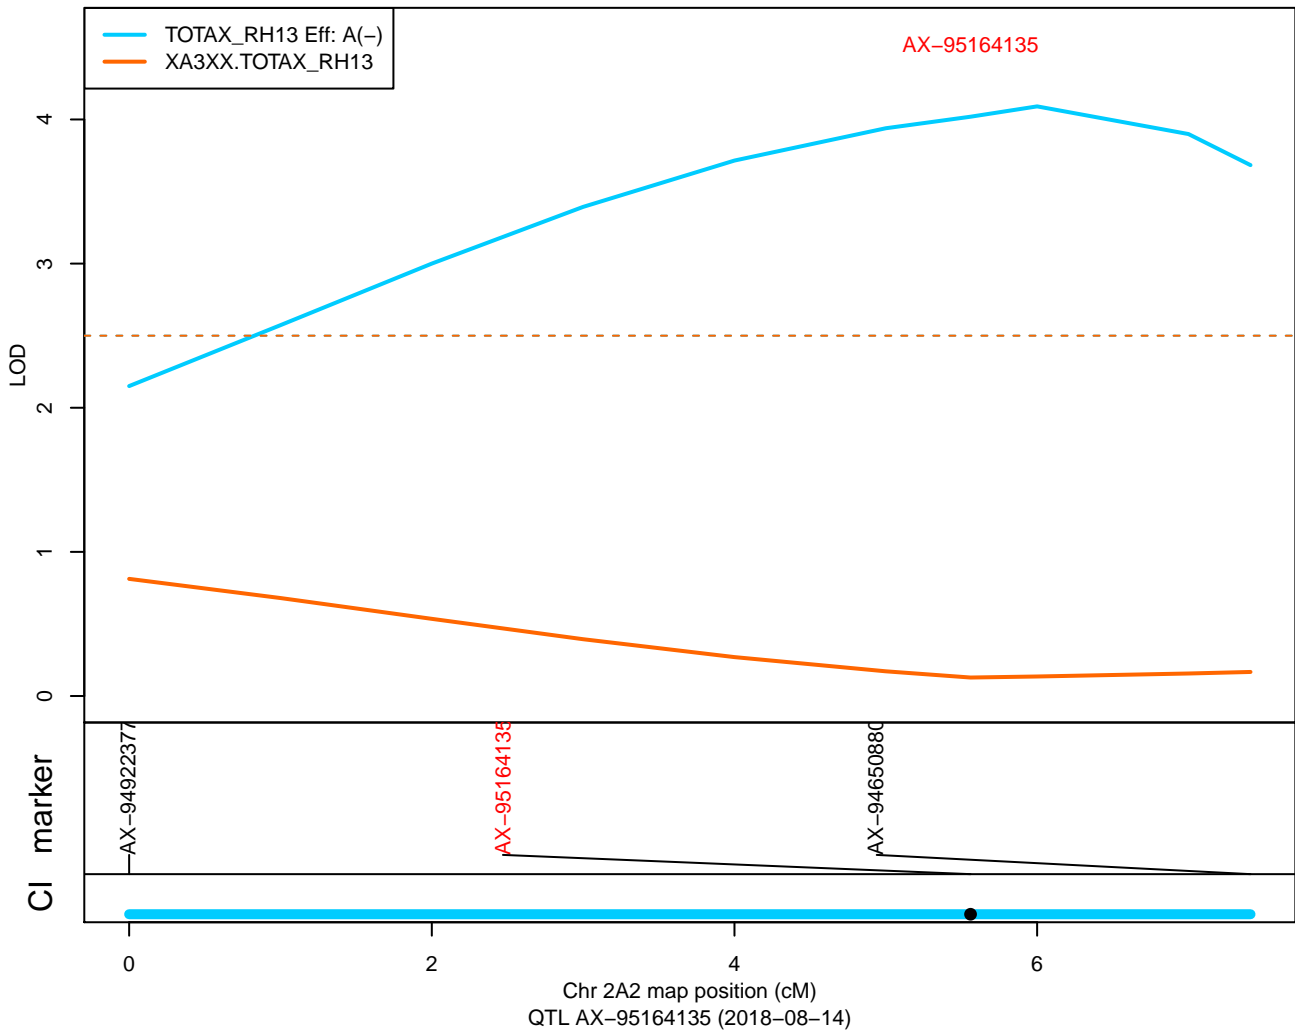

QTLs: Y34Val – ReVIS – 1A1

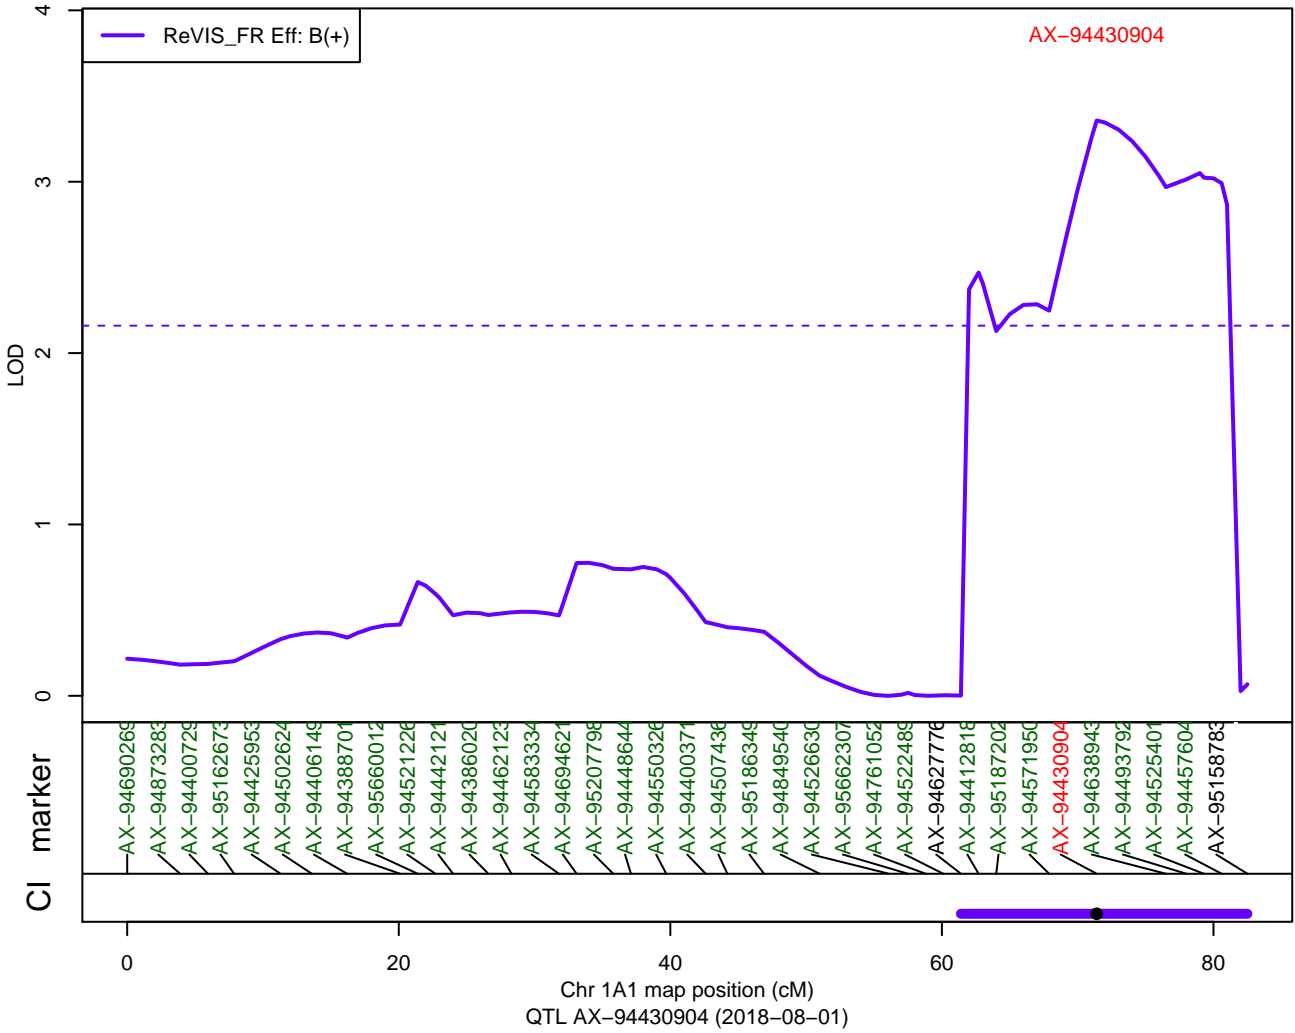

QTLs: Y34Val – ReVIS – 1B1

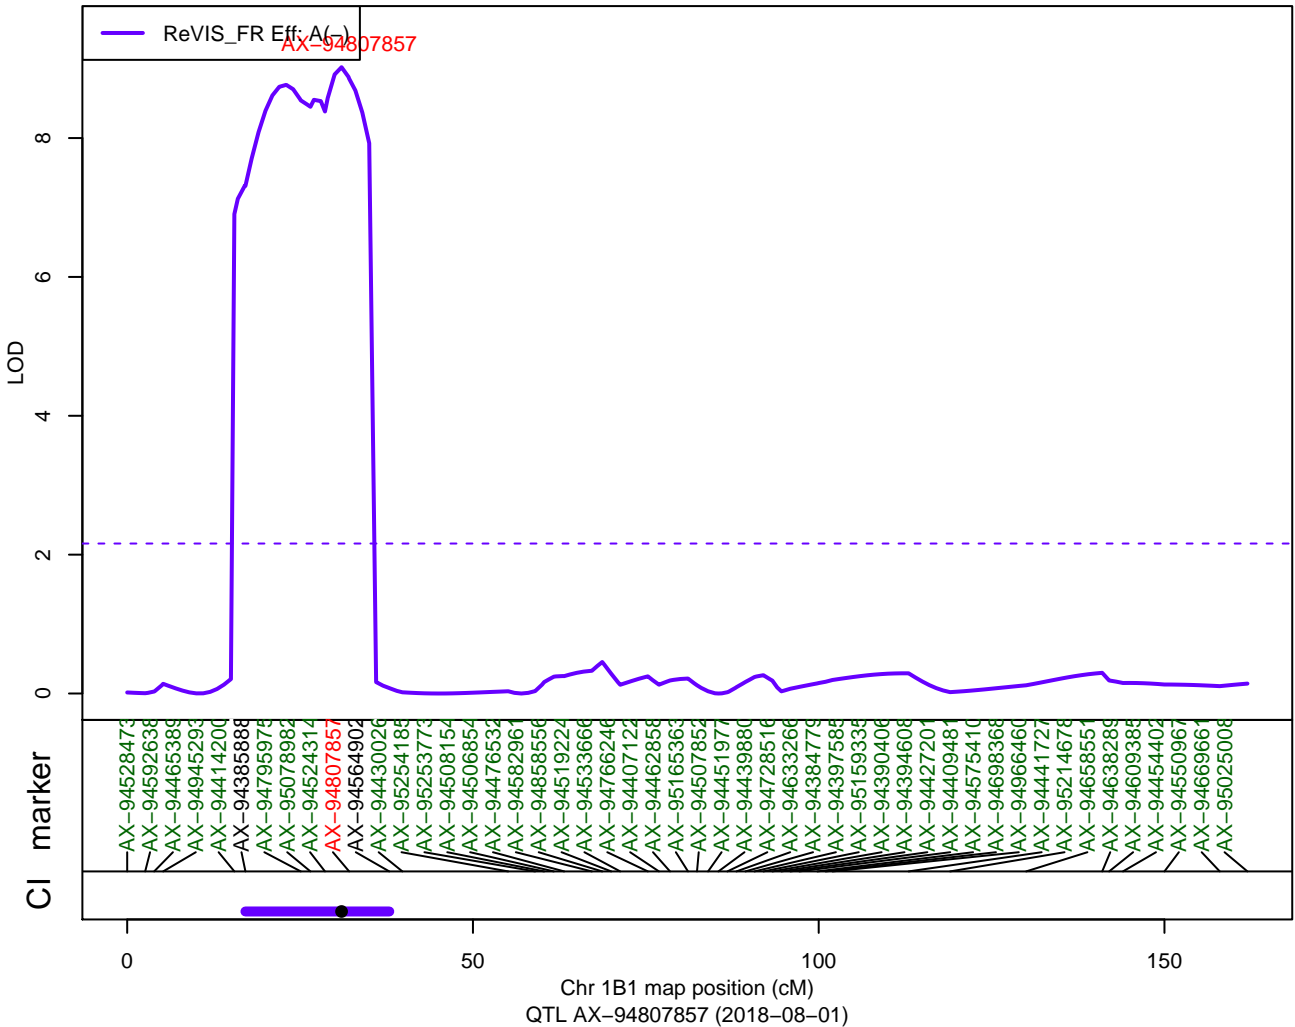

# QTLs: Y34Val – ReVIS – 6B1

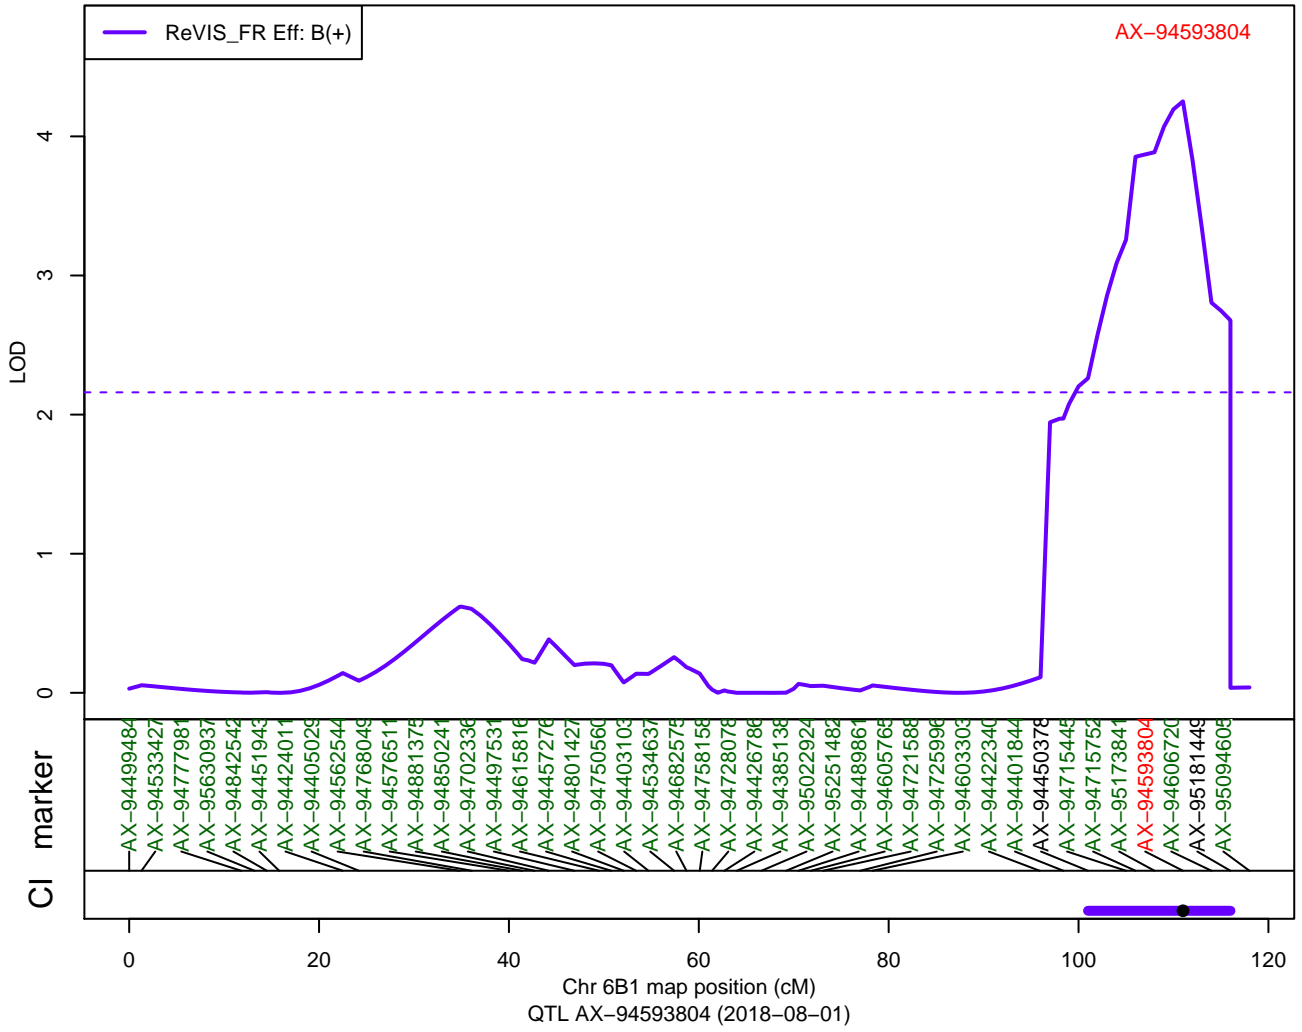

QTLs: Y34Val – TOTAX – 1A1

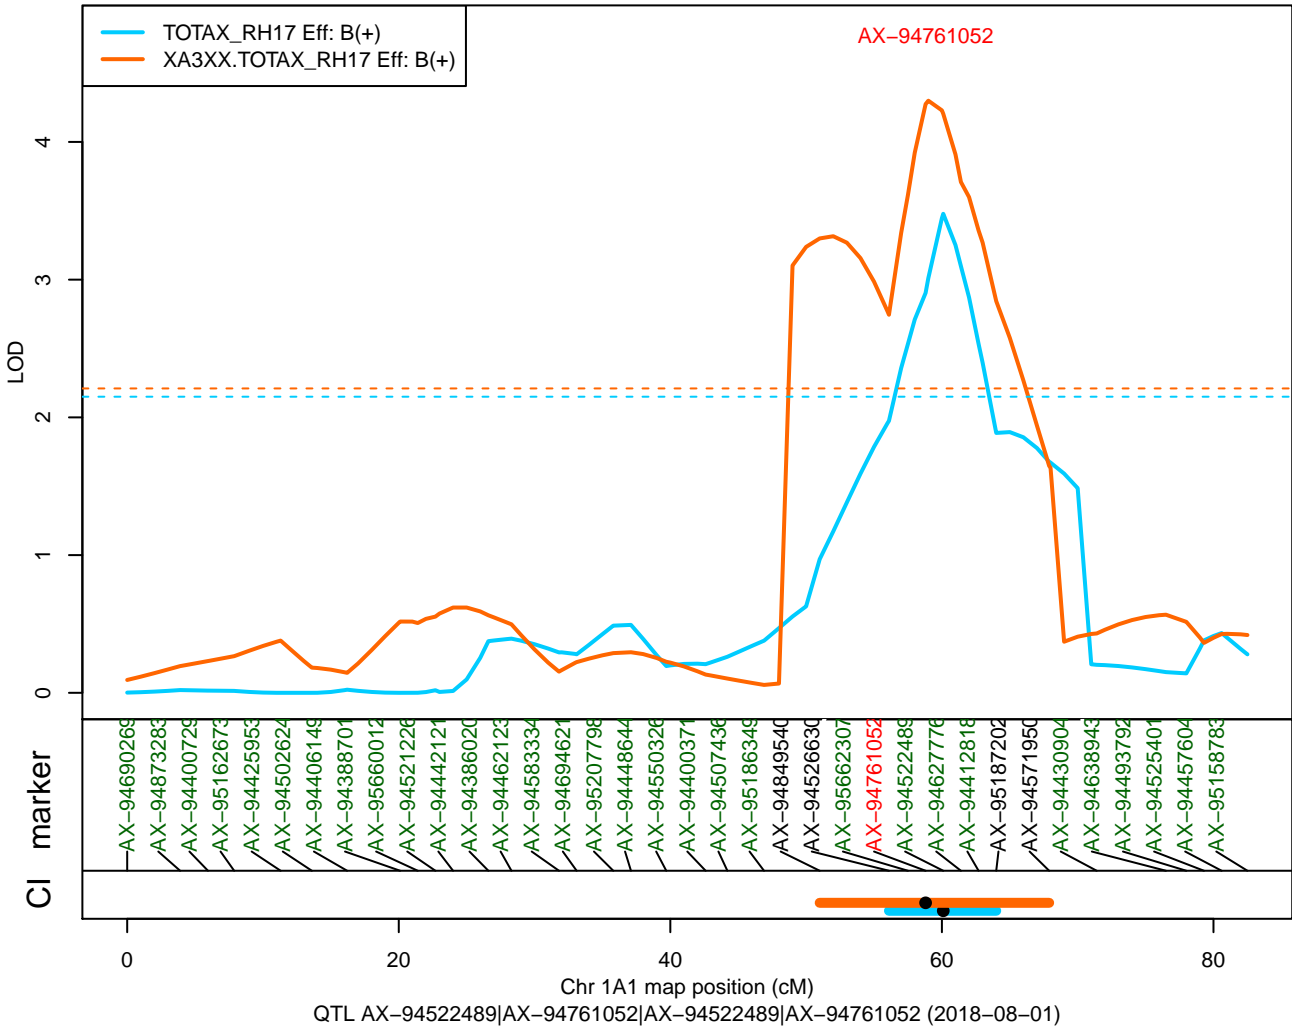

QTLs: Y34Val – TOTAX – 1B1

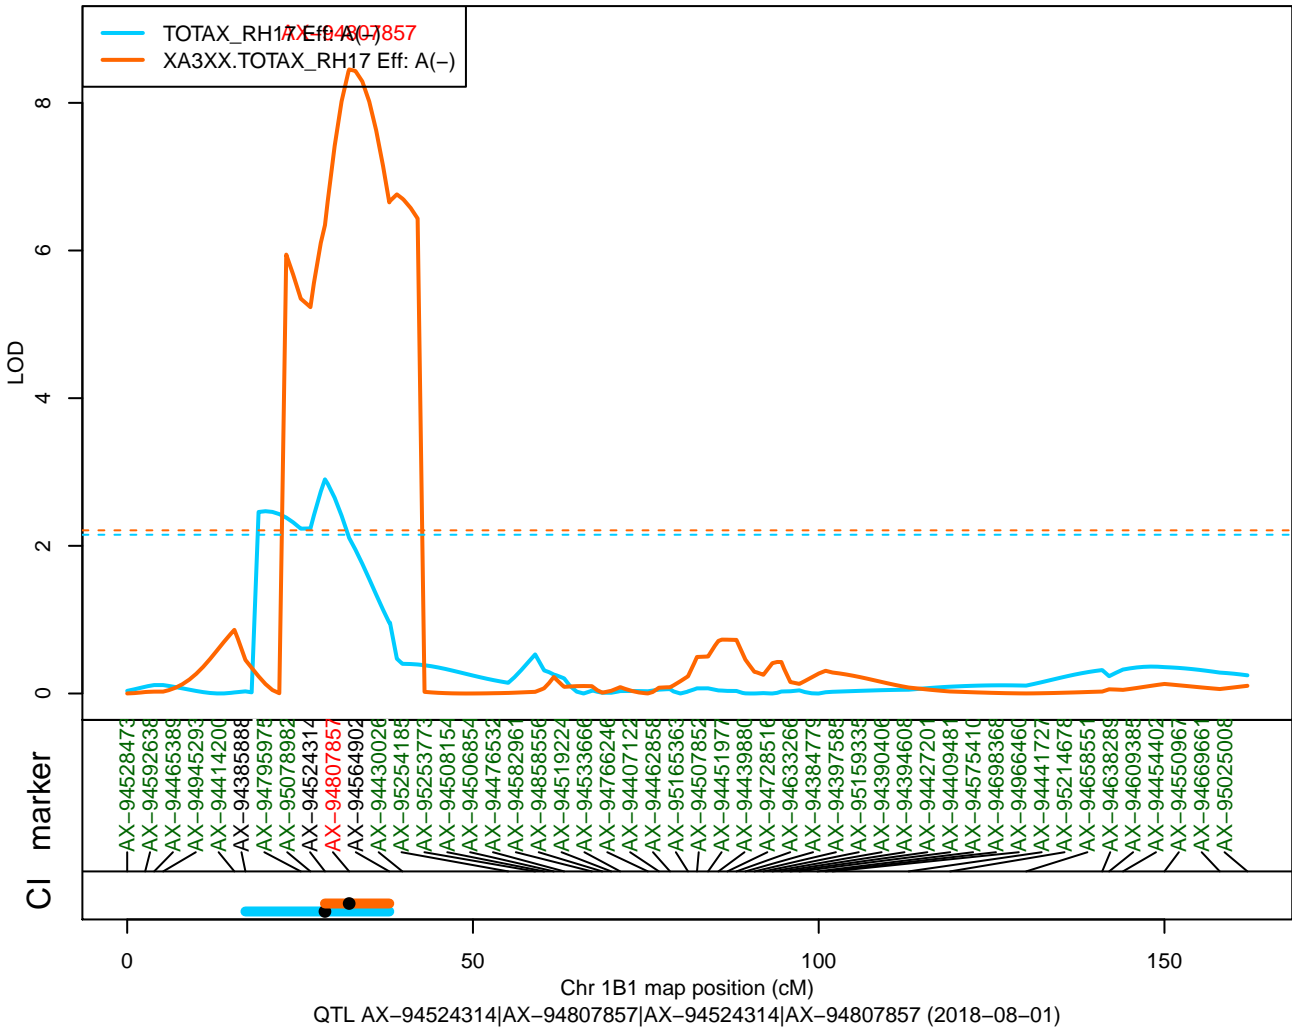

Supplement: pone.0227826.s002.pdf [file pone.0227826.s002.pdf]
