# Supplementary material for: Identification of a major QTL and associated molecular marker for high arabinoxylan fibre in white wheat flour
Source: PubMed Central journal article supplement (PMC7001892; doi:10.1371/journal.pone.0227826), 2020-02-05

Y3Alt genetic map

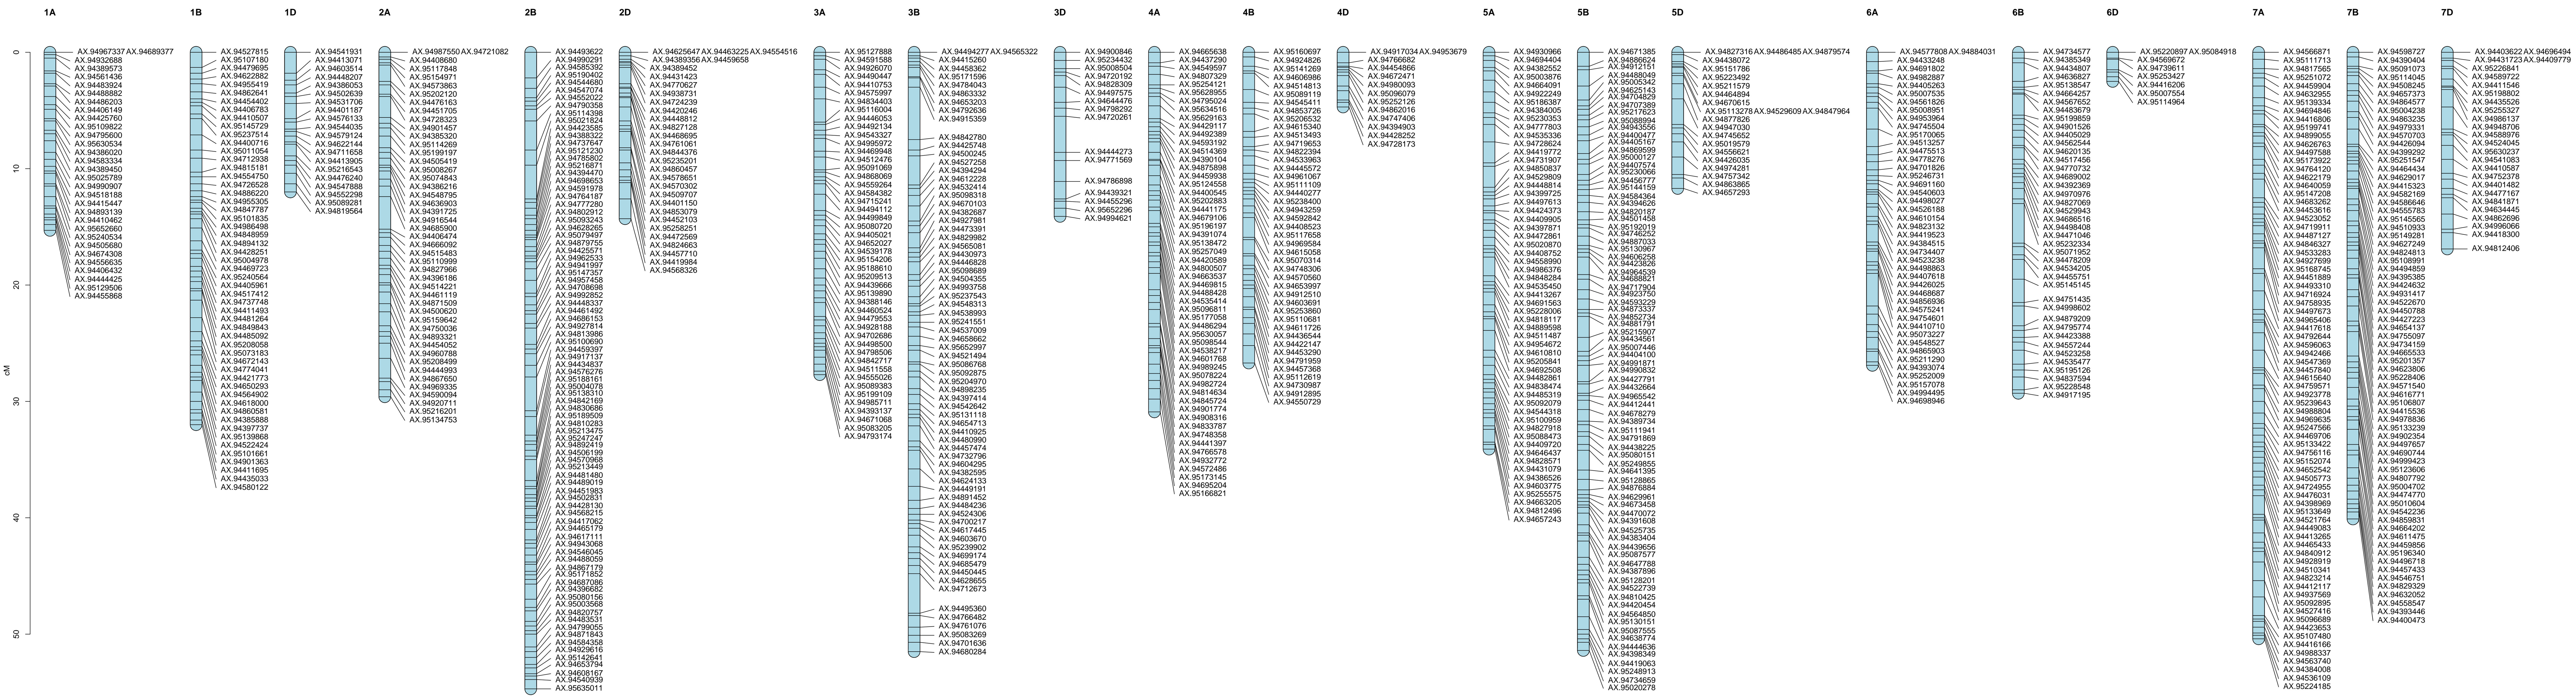



Y34Cla genetic map

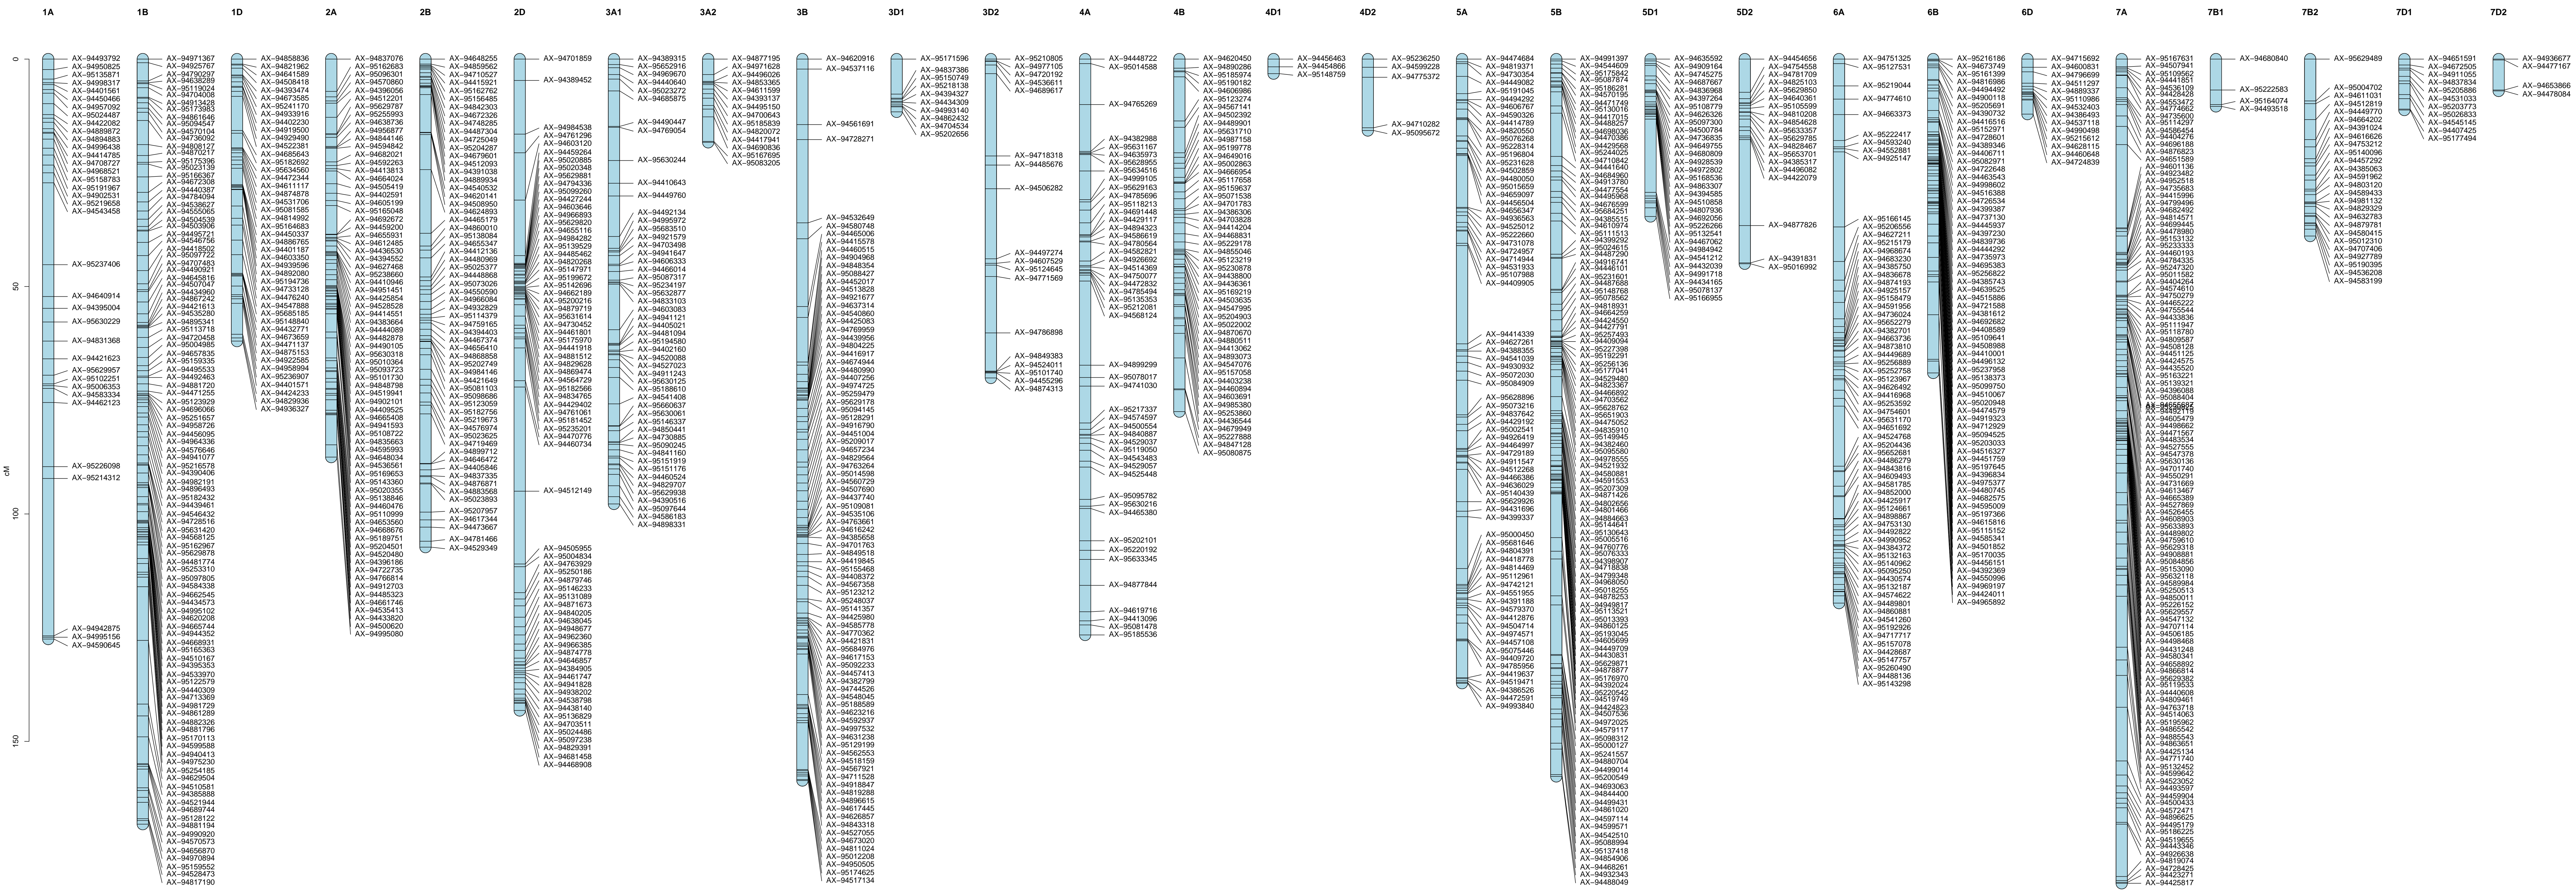



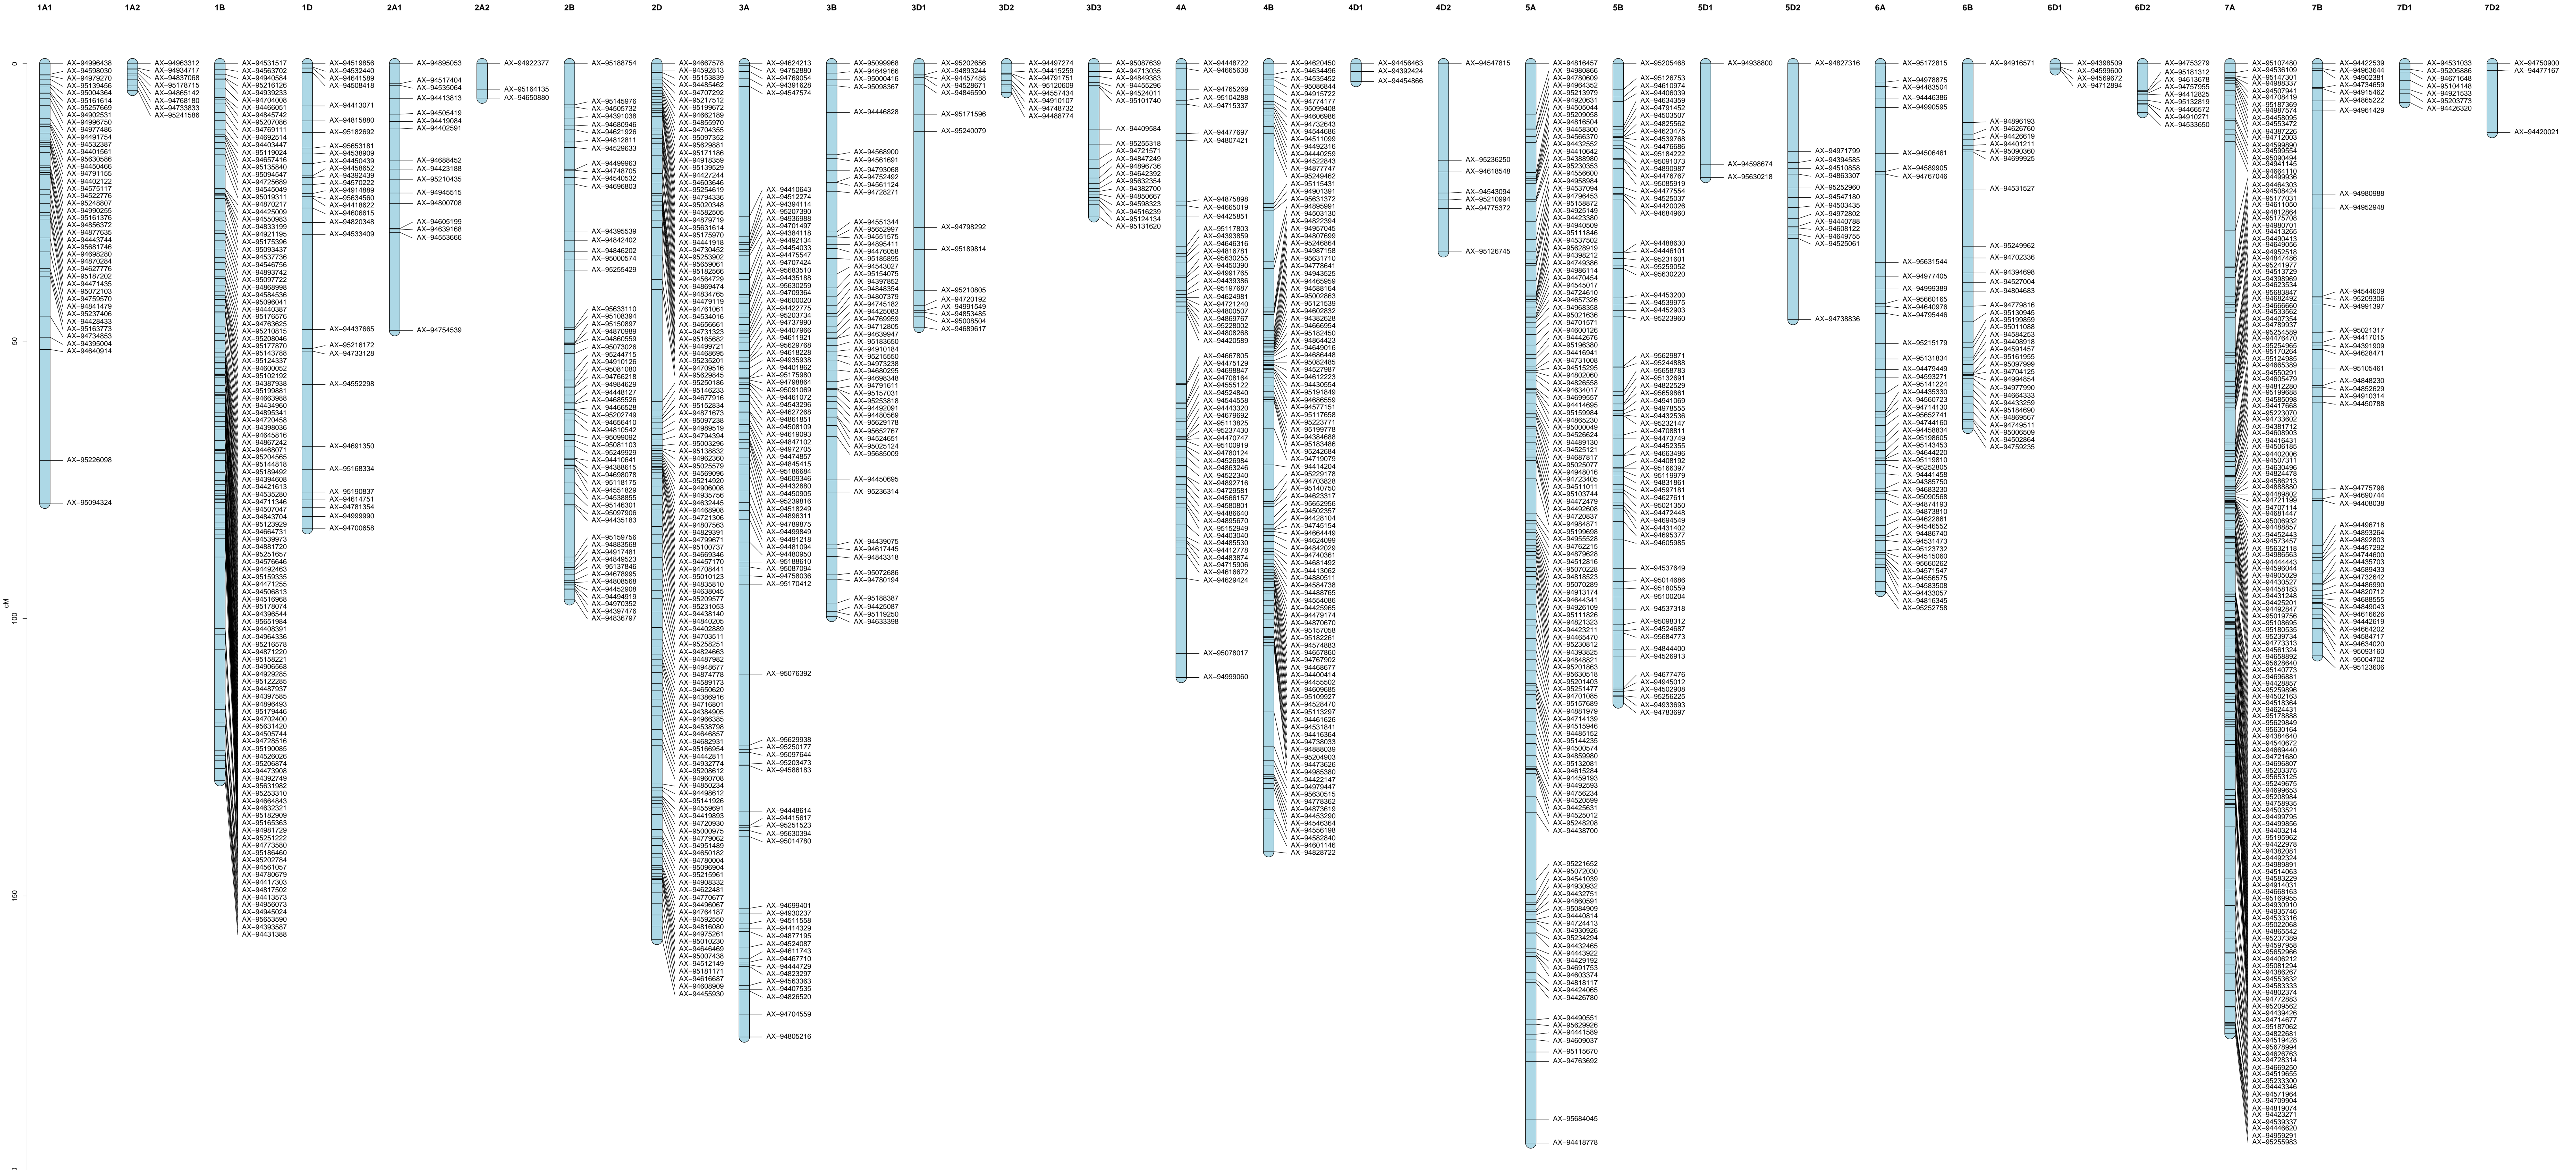



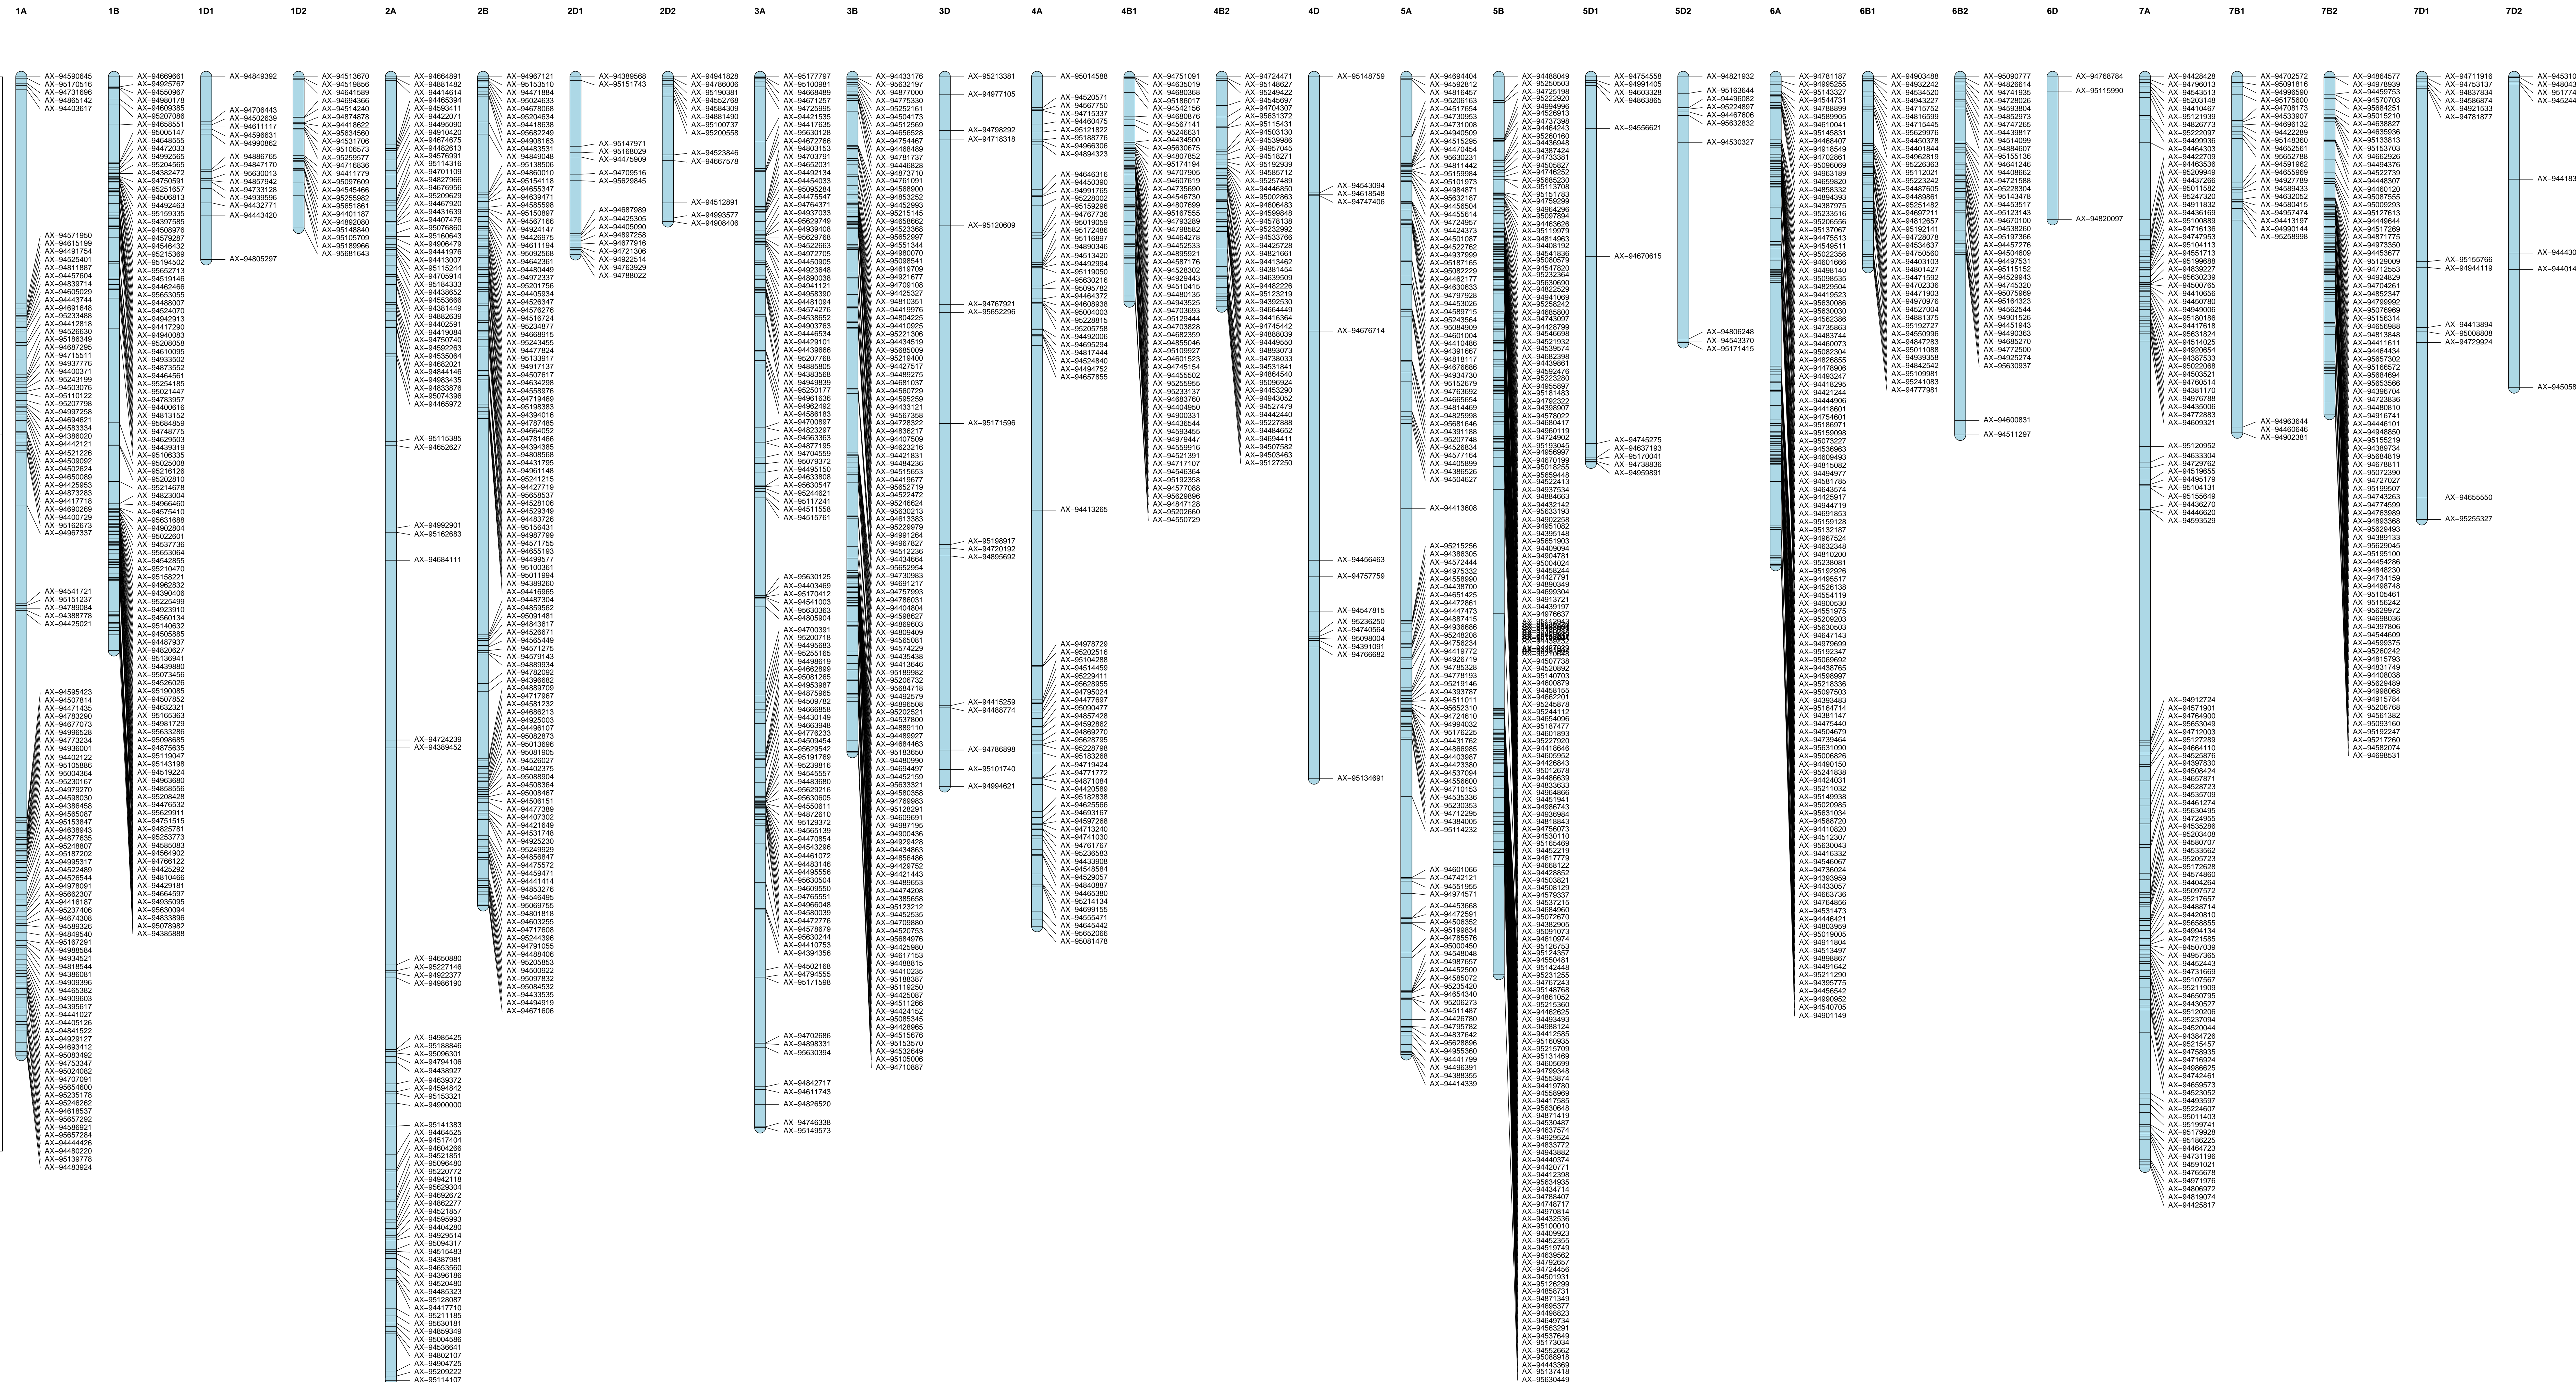

Supplement: pone.0227826.s001.pdf [file pone.0227826.s001.pdf]
