# Supplementary material for: Identification of a major QTL and associated molecular marker for high arabinoxylan fibre in white wheat flour
Source: PubMed Central journal article supplement (PMC7001892; doi:10.1371/journal.pone.0227826), 2020-02-05
Supplement: pone.0227826.s003.pdf [file pone.0227826.s003.pdf]

|                                     | White WE<br>(pentosans) | White Total (pentosans) | White Total AX<br>(fingerprinting) | White WE<br>(relative viscosity) | Wholemeal WE<br>(pentosans) | Wholemeal Total<br>(pentosans) | Wholemeal Total AX (fingerprinting) |
|-------------------------------------|-------------------------|-------------------------|------------------------------------|----------------------------------|-----------------------------|--------------------------------|-------------------------------------|
| White Total (pentosans)             | 0.62                    |                         |                                    |                                  |                             |                                |                                     |
| White Total AX (fingerprinting)     | 0.65                    | 0.67                    |                                    |                                  |                             |                                |                                     |
| White WE (relative viscosity)       | 0.62                    | 0.52                    | 0.75                               |                                  |                             |                                |                                     |
| Wholemeal WE (pentosans)            | 0.96                    | 0.52                    | 0.59                               | 0.5                              |                             |                                |                                     |
| Wholemeal Total (pentosans)         | 0.18                    | 0.23                    | -0.24                              | -0.25                            | 0.22                        |                                |                                     |
| Wholemeal Total AX (fingerprinting) | 0.81                    | 0.76                    | 0.83                               | 0.63                             | 0.74                        | 0.05                           |                                     |
| Wholemeal WE (relative viscosity)   | 0.77                    | 0.38                    | 0.55                               | 0.84                             | 0.7                         | -0.03                          | 0.63                                |

**S3 Figure. Correlation Matrix of 10 lines from the Yumai x Ukrainka population grown at Rothamsted Research in 2013-2014.**

Relative viscosity, water extractable (WE) and total AX measured colorometrically (pentosan assay), and total AX by enzyme fingerprinting in wholemeal and white flour..
