# Supplementary material for: Identification of a major QTL and associated molecular marker for high arabinoxylan fibre in white wheat flour
Source: PubMed Central journal article supplement (PMC7001892; doi:10.1371/journal.pone.0227826), 2020-02-05
Supplement: pone.0227826.s004.pdf [file pone.0227826.s004.pdf]

### Major QTL

| population | Chr | env  | trait  | LOD  | %var | add eff | phenotype mean | increase |        | QTL peak |             | CI start |                 | CI end   |               | RefSeq 1.0 Chr | QTL peak pos [bp] | CI start pos [bp] | CI end pos [bp] |
|------------|-----|------|--------|------|------|---------|----------------|----------|--------|----------|-------------|----------|-----------------|----------|---------------|----------------|-------------------|-------------------|-----------------|
|            |     |      |        |      |      |         |                | All      | LG chr | pos [cM] | marker      | pos [cM] | CI start marker | pos [cM] | CI end marker |                |                   |                   |                 |
| Y34AIt     | 1B  | FR13 | RV     | 12.6 | 16.3 | -0.53   | 3 A            | 1B       | 26     | 26       | AX-94618000 | 25.6     | AX-94564902     | 27.5     | AX-94385888   | 1B             | 649369083         | 646172163         | 660529537       |
| Y34AIt     | 2D  | FR13 | RV     | 3.2  | 3.7  | -0.26   | 3 A            | 2D1      | 9.5    | 9.5      | AX-94452103 | 5.9      | AX-94860457     | 14.3     | AX-94568326   | 2D             | 156825008         | 599946636         |                 |
| Y34AIt     | 3B  | FR13 | RV     | 6.1  | 7.4  | -0.3    | 3 A            | 3B1      | 34.2   | 34.2     | AX-94382595 | 31.4     | AX-94480990     | 35.8     | AX-94624133   | 3B             | 512742728         | 417261367         | 512742728       |
| Y34AIt     | 4D  | FR13 | RV     | 3.5  | 4.1  | -0.27   | 3 A            | 4D1      | 1      | 0.9      | AX-94766682 | 0        | AX-94917034     | 4.1      | AX-94394903   | 4D             | 426519545         | 31652113          | 426519545       |
| Y34Cla     | 1B  | J115 | TOT-AX | 3.2  | 14.1 | -3.8    | 74.4 A         | 1B       | 38     | 35.9     | AX-94385888 | 23.6     | AX-94521944     | 45       | AX-94510581   | 1B             | 660529537         | 656658155         | 668056547       |
| Y34Cla     | 2B  | J116 | RV     | 3.1  | 11.4 | -0.04   | 1.8 A          | 2B       | 158    | 159      | AX-94421649 | 0        | AX-94648255     | 268.2    | AX-94529349   | 2B             | 249418689         | 4503734           | 747573949       |
| Y34Cla     | 3B  | J116 | RV     | 5.9  | 23.9 | -0.01   | 1.8 A          | 3B       | 148    | 150.3    | AX-95629178 | 145.6    | AX-95259479     | 154.9    | AX-95094145   | 3B             | 488873234         | 474767686         | 522395687       |
| Y34Ukr     | 1A  | RH13 | TOT-AX | 3.2  | 13   | 2.1     | 95.1 B         | 1A2      | 11.5   | 11.5     | AX-94902531 | 4.3      | AX-94996438     | 17.5     | AX-95684821   | 1A             | 8130190           | 1145413           | 12157282        |
| Y34Ukr     | 1B  | RH13 | TOT-AX | 5.1  | 21.6 | -3      | 95.1 A         | 1B       | 227.7  | 227.7    | AX-94845742 | 219.3    | AX-95094547     | 241.9    | AX-95222141   | 1B             | 15745889          | 1252520           | 23978766        |
| Y34Val     | 1A  | FR13 | RV     | 3.8  | 10.3 | 0.62    | 4.5 B          | 1A1      | 71.4   | 71.4     | AX-94430904 | 61.4     | AX-94627776     | 82.5     | AX-95158783   | 1A             | 21282281          | 3845868           | 30193309        |
| Y34Val     | 1B  | FR13 | RV     | 7.8  | 24.2 | -0.99   | 4.5 A          | 1B1      | 31     | 32.1     | AX-94807857 | 17.1     | AX-94385888     | 37.9     | AX-94564902   | 1B             | 652575871         | 646172163         | 660529537       |
| Y34Val     | 6B  | FR13 | RV     | 4.4  | 12.3 | 0.85    | 4.5 B          | 6B1      | 111    | 111      | AX-94593804 | 101      | AX-94450378     | 116      | AX-95181449   | 6B             | 22233686          | 11299395          | 28116150        |

### Minor QTL

| population | Chr | env  | trait  | LOD | %var | add eff | phenotype mean | increase |        | QTL peak |             | CI start |                 | CI end   |               | RefSeq 1.0 Chr | QTL peak pos [bp] | CI start pos [bp] | CI end pos [bp] |
|------------|-----|------|--------|-----|------|---------|----------------|----------|--------|----------|-------------|----------|-----------------|----------|---------------|----------------|-------------------|-------------------|-----------------|
|            |     |      |        |     |      |         |                | All      | LG chr | pos [cM] | marker      | pos [cM] | CI start marker | pos [cM] | CI end marker |                |                   |                   |                 |
| Y34AIt     | 2B  | FR13 | RV     | 2.7 | 3.1  | -0.26   | 3 A            | 2B       | 44.9   | 44.9     | AX-94546045 | 42.2     | AX-94428130     | 47       | AX-95171852   | 2B             | 47425660          | 45787181          | 75613709        |
| Y34AIt     | 4B  | FR13 | RV     | 2.4 | 2.9  | 0.22    | 3 B            | 4B1      | 4.8    | 4.8      | AX-94853726 | 0.4      | AX-94924826     | 6.8      | AX-94615340   | 4B             | 17270078          | 6030086           | 31707105        |
| Y34Cla     | 2D  | J116 | TOT-AX | 2.5 | 12.4 | 1.76    | 8 A            | 2D       | 228    | 237.7    | AX-94389452 | 77.7     | AX-94538798     | 246.3    | AX-94701859   | 2D             | 6903817           | 6903817           | 601245173       |
| Y34Cla     | 3A  | J116 | RV     | 2   | 7.3  | 0.02    | 1.8 B          | 3A1      | 67.3   | 67.3     | AX-94603083 | 59       | AX-95194580     | 86.3     | AX-94833103   | 3A             | 602680124         | 485011990         | 613393005       |
| Y34Cla     | 5D  | J115 | TOT-AX | 1.6 | 7    | -0.08   | 74.4 B         | 5D2      | 62     | 59.7     | AX-94877826 | 26.6     | AX-94422079     | 78.5     | AX-94391831   | 5D             | 453240756         | 97827010          | 439786302       |
| Y34Ukr     | 2A  | RH13 | TOT-AX | 2.9 | 9.7  | 0.04    | 95.1 A         | 2A2      | 5.6    | 5.6      | AX-95164135 | 0        | AX-94922377     | 7.4      | AX-94650880   | 2A             | 5400000           | 2151813           | 8719514         |
| Y34Ukr     | 3B  | RH13 | RV     | 2.9 | 14.3 | -0.06   | 1.8 B          | 3B       | 100.3  | 100.3    | AX-94769959 | 98.2     | AX-94425083     | 118.7    | AX-94910184   | 3B             | 190889006         | 167734656         | 452103409       |
| Y34Val     | 1A  | FR13 | TOT-AX | 2.4 | 12   | 1.16    | 10.7 B         | 1A1      | 60.1   | 60.1     | AX-94522489 | 56.1     | AX-94526630     | 64       | AX-95187202   | 1A             | 32302672          | 24944673          | 42550052        |
| Y34Val     | 1B  | FR13 | TOT-AX | 2.5 | 12.6 | -1.18   | 10.7 A         | 1B1      | 28.6   | 28.6     | AX-94524314 | 17.1     | AX-94385888     | 37.9     | AX-94564902   | 1B             | 656852312         | 646172163         | 660529537       |
