# Supplementary material for: Identification of a major QTL and associated molecular marker for high arabinoxylan fibre in white wheat flour
Source: PubMed Central journal article supplement (PMC7001892; doi:10.1371/journal.pone.0227826), 2020-02-05
Supplement: pone.0227826.s005.pdf [file pone.0227826.s005.pdf]

**S2 Table. Comparison of the contents of total and water-extractable AX (determined as pentosan) in white flour from three wheat cultivars grown in field trials over 10 years (2009-2018).**

| <b>Cultivar</b> |       | <b>Total pentosan<br/>(mg/ g dry weight)</b> | <b>Water-extractable<br/>pentosan<br/>(mg/ g dry weight)</b> |
|-----------------|-------|----------------------------------------------|--------------------------------------------------------------|
| <b>Yumai 34</b> | range | 18.60-23.38                                  | 8.43-11.41                                                   |
|                 | mean  | 20.65                                        | 9.52                                                         |
|                 | SD    | 1.76                                         | 0.87                                                         |
| <b>Ukrainka</b> | range | 14.29-18.19                                  | 4.35-6.93                                                    |
|                 | mean  | 16.45                                        | 5.68                                                         |
|                 | SD    | 1.48                                         | 0.83                                                         |
| <b>Lupus</b>    | range | 14.06-18.76                                  | 5.42-7.28                                                    |
|                 | mean  | 16.48                                        | 6.52                                                         |
|                 | SD    | 1.81                                         | 0.64                                                         |
