# Supplementary material for: Identification of a major QTL and associated molecular marker for high arabinoxylan fibre in white wheat flour
Source: PubMed Central journal article supplement (PMC7001892; doi:10.1371/journal.pone.0227826), 2020-02-05
Supplement: pone.0227826.s006.pdf [file pone.0227826.s006.pdf]

**S3 Table. Marker trait associations identified for relative viscosity in the WHEALBI panel.**

| marker     | chrom | position  | VP (-      |     |     |                    | Closest HC           | Closest LC |
|------------|-------|-----------|------------|-----|-----|--------------------|----------------------|------------|
|            |       |           | LogPvalue) | REF | ALT |                    |                      |            |
| WTa_011962 |       | 652455501 | 1.19E+01   | T   | C   | TraesCS1B01G426300 | TraesCS1B01G723400LC |            |
| WTa_09ac26 |       | 652302035 | 1.16E+01   | T   | C   | TraesCS1B01G426000 | TraesCS1B01G723300LC |            |
| WTa_09ac27 | 1B    | 652302058 | 1.16E+01   | A   | C   | TraesCS1B01G426000 | TraesCS1B01G723300LC |            |
| WTa_09ac28 |       | 652302152 | 1.16E+01   | G   | A   | TraesCS1B01G426000 | TraesCS1B01G723300LC |            |
| WTa_011959 |       | 652453983 | 1.12E+01   | G   | A   | TraesCS1B01G426300 | TraesCS1B01G723400LC |            |
| WTa_074b4f |       | 26076251  | 1.01E+01   | A   | T   | TraesCS6B01G042500 | TraesCS6B01G056200LC |            |
| WTa_074b50 |       | 26076566  | 1.01E+01   | G   | C   | TraesCS6B01G042600 | TraesCS6B01G056200LC |            |
| WTa_074b53 | 6B    | 26076692  | 1.01E+01   | C   | T   | TraesCS6B01G042600 | TraesCS6B01G056200LC |            |
| WTa_074b54 |       | 26076727  | 1.01E+01   | C   | T   | TraesCS6B01G042600 | TraesCS6B01G056200LC |            |
| WTa_0b5393 |       | 26077228  | 1.01E+01   | C   | T   | TraesCS6B01G042600 | TraesCS6B01G056200LC |            |

| marker     | chrom | position  | VP (-      |     |     |                    | Closest HC           | Closest LC |
|------------|-------|-----------|------------|-----|-----|--------------------|----------------------|------------|
|            |       |           | LogPvalue) | REF | ALT |                    |                      |            |
| WTa_011962 |       | 652455501 | 1.19E+01   | T   | C   | TraesCS1B01G426300 | TraesCS1B01G723400LC |            |
| WTa_09ac26 |       | 652302035 | 1.16E+01   | T   | C   | TraesCS1B01G426000 | TraesCS1B01G723300LC |            |
| WTa_09ac27 | 1B    | 652302058 | 1.16E+01   | A   | C   | TraesCS1B01G426000 | TraesCS1B01G723300LC |            |
| WTa_09ac28 |       | 652302152 | 1.16E+01   | G   | A   | TraesCS1B01G426000 | TraesCS1B01G723300LC |            |
| WTa_011959 |       | 652453983 | 1.12E+01   | G   | A   | TraesCS1B01G426300 | TraesCS1B01G723400LC |            |
| WTa_074b4f | 6B    | 26076251  | 1.01E+01   | A   | T   | TraesCS6B01G042500 | TraesCS6B01G056200LC |            |

|            |          |          |   |   |                    |                      |
|------------|----------|----------|---|---|--------------------|----------------------|
| WTa_074b50 | 26076566 | 1.01E+01 | G | C | TraesCS6B01G042600 | TraesCS6B01G056200LC |
| WTa_074b53 | 26076692 | 1.01E+01 | C | T | TraesCS6B01G042600 | TraesCS6B01G056200LC |
| WTa_074b54 | 26076727 | 1.01E+01 | C | T | TraesCS6B01G042600 | TraesCS6B01G056200LC |
| WTa_0b5393 | 26077228 | 1.01E+01 | C | T | TraesCS6B01G042600 | TraesCS6B01G056200LC |

| marker     | chrom | position  | VP (-      |         | Closest HC         | Closest LC           |
|------------|-------|-----------|------------|---------|--------------------|----------------------|
|            |       |           | LogPvalue) | REF ALT |                    |                      |
| WTa_011962 |       | 652455501 | 1.19E+01   | T C     | TraesCS1B01G426300 | TraesCS1B01G723400LC |
| WTa_09ac26 |       | 652302035 | 1.16E+01   | T C     | TraesCS1B01G426000 | TraesCS1B01G723300LC |
| WTa_09ac27 | 1B    | 652302058 | 1.16E+01   | A C     | TraesCS1B01G426000 | TraesCS1B01G723300LC |
| WTa_09ac28 |       | 652302152 | 1.16E+01   | G A     | TraesCS1B01G426000 | TraesCS1B01G723300LC |
| WTa_011959 |       | 652453983 | 1.12E+01   | G A     | TraesCS1B01G426300 | TraesCS1B01G723400LC |
| WTa_074b4f |       | 26076251  | 1.01E+01   | A T     | TraesCS6B01G042500 | TraesCS6B01G056200LC |
| WTa_074b50 |       | 26076566  | 1.01E+01   | G C     | TraesCS6B01G042600 | TraesCS6B01G056200LC |
| WTa_074b53 | 6B    | 26076692  | 1.01E+01   | C T     | TraesCS6B01G042600 | TraesCS6B01G056200LC |
| WTa_074b54 |       | 26076727  | 1.01E+01   | C T     | TraesCS6B01G042600 | TraesCS6B01G056200LC |
| WTa_0b5393 |       | 26077228  | 1.01E+01   | C T     | TraesCS6B01G042600 | TraesCS6B01G056200LC |

Markers as in Pont et al. [32]; chrom is chromosome alignment of marker position to the Chinese Spring reference genome and position in bp; LogP is the log p value of the association, REF is the base at the marker position in the Chinese Spring reference genome; ALT is the alternative allele present in the panel; Closest HC and LC are the nearest high and low confidence gene models, respectively.
